# Supplementary material for: Repeated translocation of a supergene underlying rapid sex chromosome turnover in Takifugu pufferfish
Source: PubMed Central journal article supplement — Proc Natl Acad Sci U S A. 2022 Jun 3;119(23):e2121469119. doi: 10.1073/pnas.2121469119 (PMC9191631; doi:10.1073/pnas.2121469119), 2022-06-03
Supplement: pnas.2121469119.sapp.pdf [file pnas.2121469119.sapp.pdf]

## **Supplementary Information for**

Repeated translocation of a supergene underlying rapid sex chromosome turnover in *Takifugu* pufferfish.

Ahammad Kabir, Risa Ieda, Sho Hosoya, Daigaku Fujikawa, Kazufumi Atsumi, Shota Tajima, Aoi Nozawa, Takashi Koyama, Shotaro Hirase, Osamu Nakamura, Mitsutaka Kadota, Osamu Nishimura, Shigehiro Kuraku, Yasukazu Nakamura, Hisato Kobayashi, Atsushi Toyoda, Satoshi Tasumi, Kiyoshi Kikuchi

Corresponding author: Kiyoshi Kikuchi and Sho Hosoya

Email: akikuchi@mail.ecc.u-tokyo.ac.jp, ahosoya@mail.ecc.u-tokyo.ac.jp

### **This PDF file includes:**

Supplementary Figure S1 – S16

References for Supplementary Figure citations

Supplementary text: Supplementary Materials and Methods.

References for Supplementary Materials and Methods citations

Supplementary Tables S1 – S20

### **Other supplementary Dataset for this manuscript include the following:**

DNA sequences around the exon9 of *Amhr2* (Fasta1\_amhr2exon9.txt)

DNA sequences for Y-specific genes and their autosomal paralogs

(Fasta2\_genes\_on\_SDR\_and\_their\_paralogs.txt)

Genotype data for genetic mapping (mapping\_genotype.xlsx)

# Supplementary Figures

(A)

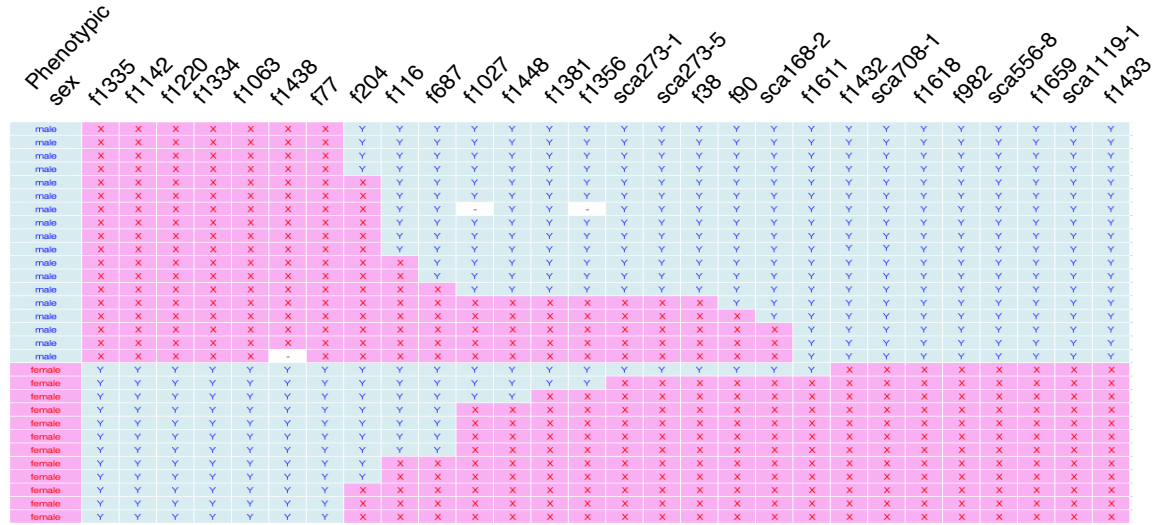

(B)

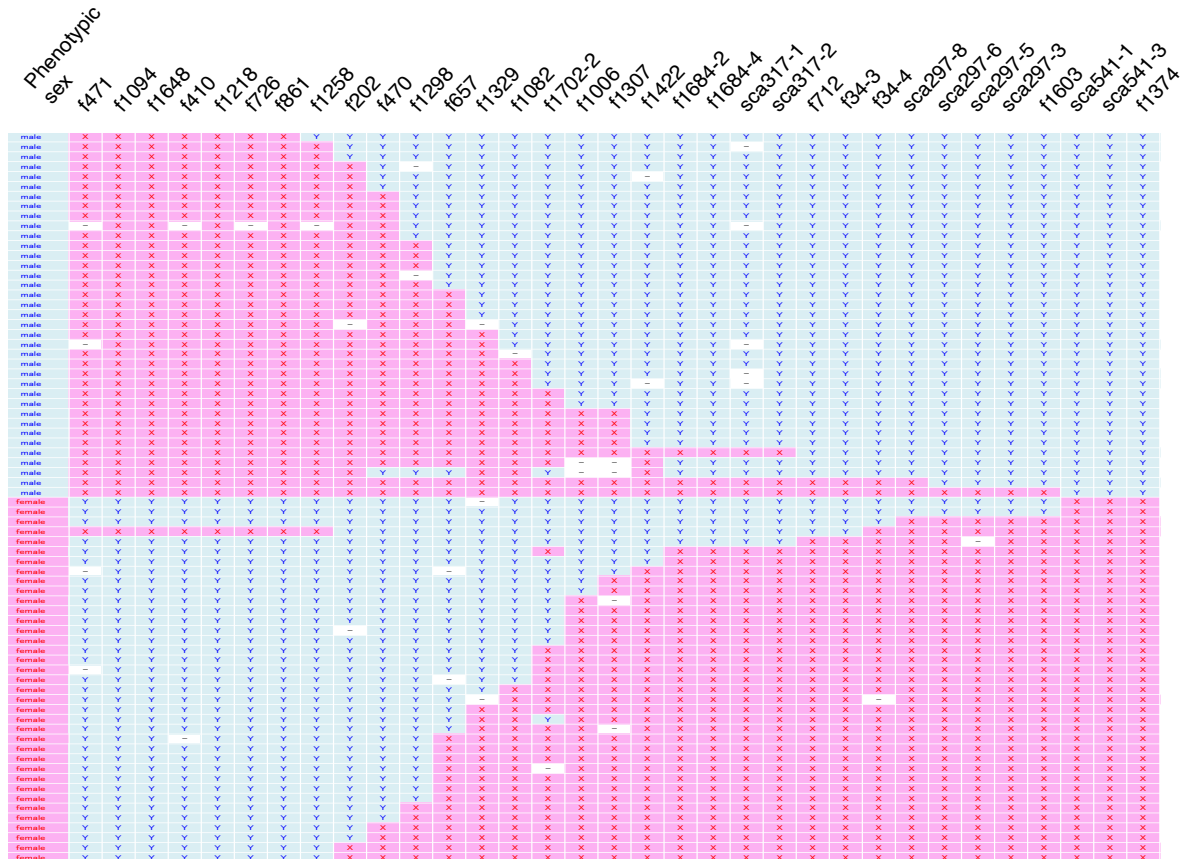

Fig. S1. The search for individuals with recombination near the sex-determining locus in *T. snyderi* (A) and *T. vermicularis* (B). (A) To fine map the sex-determining locus in *T. snyderi*, we first used

two markers, f1335 and f1433, that were previously mapped on Chr18 in *T. rubripes* (fugu). We genotyped the two markers in 765 fish from three families (342, 158, and 265 fish in Families A, B, and C, respectively), and identified 30 recombinants. We then genotyped 26 microsatellite markers flanked by the two markers on Chr18 in those individuals. The first row of the table contains the marker names. The rows below show the data of recombinant individuals identified by the screening. “X” and “Y” indicate female- and male-associated alleles, respectively, inherited from the father. Empty blocks indicate that genotypes are not assigned. The results suggest tight linkage of the sex-determining locus with markers near the distal end of Chr18, as well as linkage between the marker loci. Thus, the synteny of this region is conserved between *T. snyderi* and *T. rubripes* (fugu), except for the sex-determining locus. (B) For *T. vermicularis*, 35 markers, most of which have been previously mapped on Chr10 in *T. rubripes*, were used to screen 226 fish in Family D and E. We found 73 fish with recombination between the most distant markers, f471 and f1374. This analysis suggests both tight linkage of the sex-determining locus with the distal end of Chr10 and conserved synteny of this region between *T. vermicularis* and *T. rubripes*, except for the sex-determining locus.

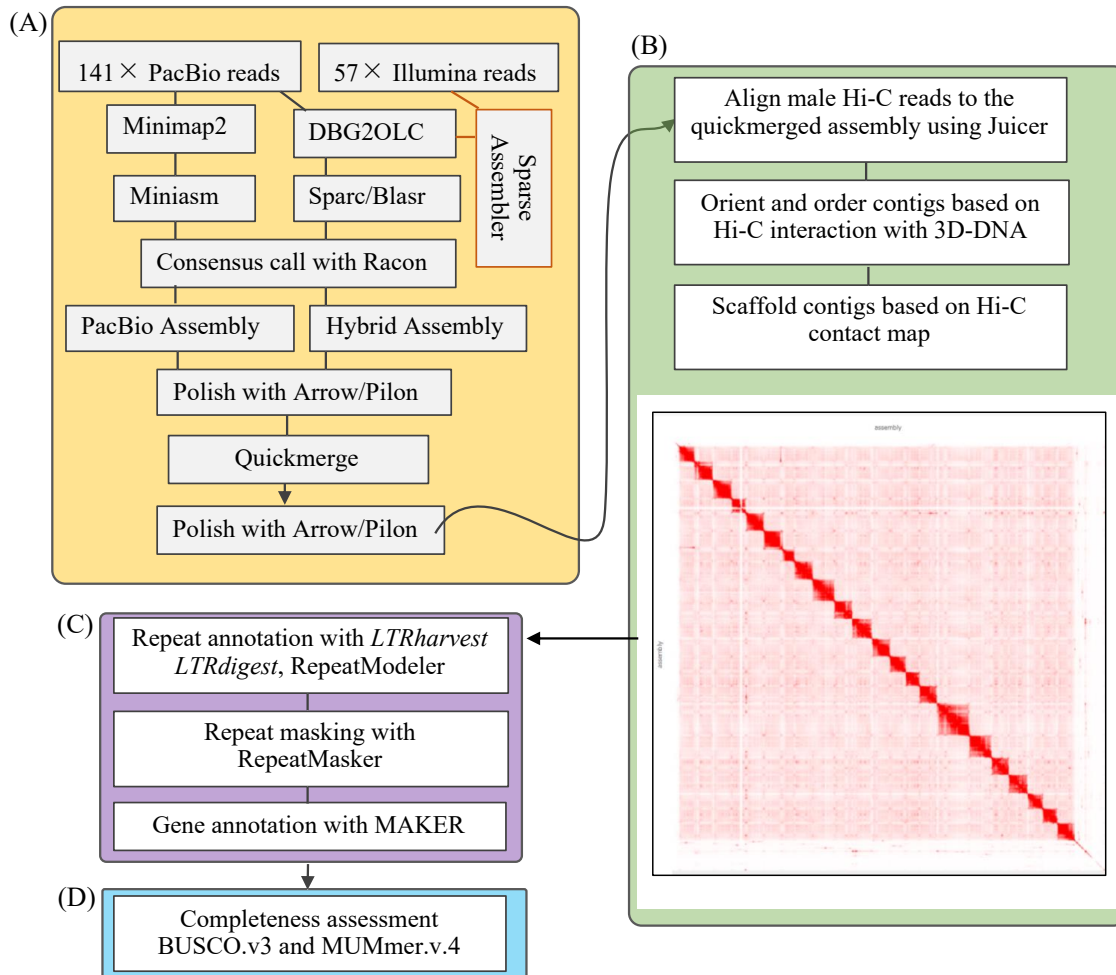

Fig. S2. Schematic overview of the genome assembly process in *T. niphobles* with the YY genotype. (A) Initial genome contigs were generated by two strategies: (1) PacBio long-read-only assembly using Minimap2 and Miniasm, and (2) hybrid assembly using DBG2OLC and SparseAssembler by the combination of PacBio long reads and Illumina short reads. The two assemblies were merged using Quickmerge. (B) The Hi-C reads were aligned to the merged assembly using Juicer. Hi-C scaffolding was performed with 3D-DNA using the Juicer output. (C) Gene annotation was conducted using MAKER with evidence from RNA-seq transcriptomes data, predicted protein sequences from FUGU5, and ab initio gene predictions from SNAP and AUGUSTUS, followed by repeat annotation using *LTRharvest*, *LTRdigest*, and RepeatModeler. Repeat-rich regions were identified by RepeatMasker. (D) Genome completeness was assessed by BUSCO (v. 3.0.2).

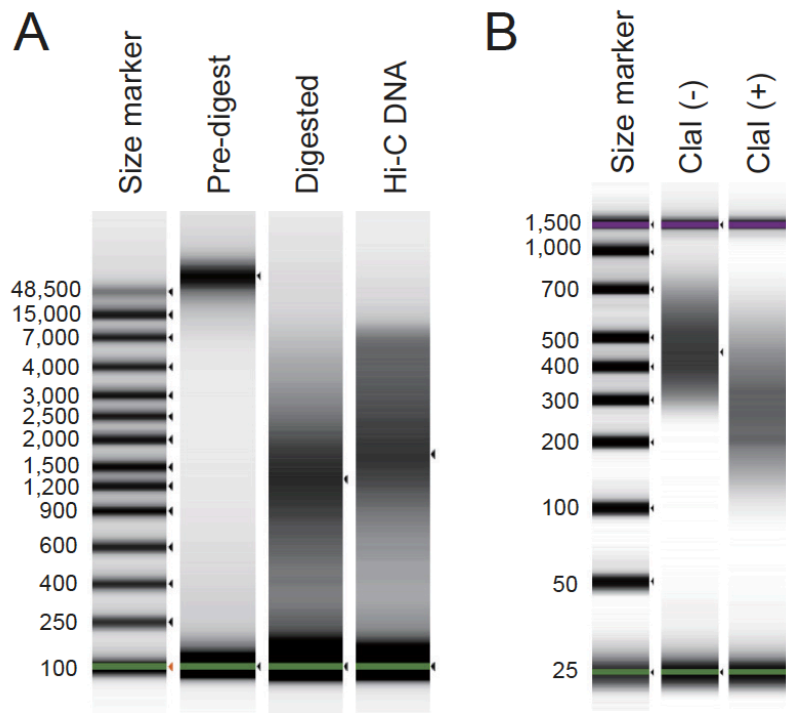

Fig. S3A. Quality control of Hi-C DNA and the Hi-C library.

(A) Size-shift analysis of pre-digested, digested, and ligated DNA (Hi-C DNA) with an Agilent TapeStation using the Genomic DNA ScreenTape assay. (B) Size-shift analysis of the Hi-C library, with or without ClaI restriction enzyme digestion, with an Agilent TapeStation using the High-Sensitivity D1000 ScreenTape assay.

|                                    | Pre-HiC    | i12000_r2 (with misjoin) | i12000_r0 (without misjoin) |
|------------------------------------|------------|--------------------------|-----------------------------|
| Number of scaffolds                | 728        | 1,628                    | 424                         |
| Number of scaffolds > 1 K nt       | 728        | 1,628                    | 415                         |
| Number of scaffolds > 10 K nt      | 713        | 1,508                    | 358                         |
| Number of scaffolds > 100 K nt     | 242        | 215                      | 86                          |
| Number of scaffolds > 1 M nt       | 68         | 24                       | 23                          |
| Number of scaffolds > 10 M nt      | 8          | 20                       | 22                          |
| Largest scaffold length            | 15,050,114 | 24,532,149               | 29,787,861                  |
| N50 scaffold length                | 6,083,713  | 13,322,009               | 16,184,500                  |
| Sum of sequence length > 1 M (%)   | 81.8       | 77.3                     | 92.8                        |
| Sum of sequence length > 10 M (%)  | 24.9       | 72                       | 91.2                        |
| Number of complete genes           | 4,340      | 4,301                    | 4,326                       |
| Number of complete + partial genes | 4,484      | 4,467                    | 4,478                       |

(A) scaffolding with misjoin steps

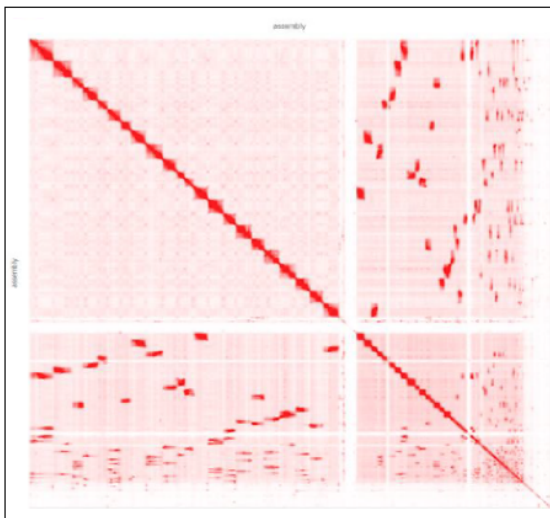

(B) scaffolding without misjoin steps

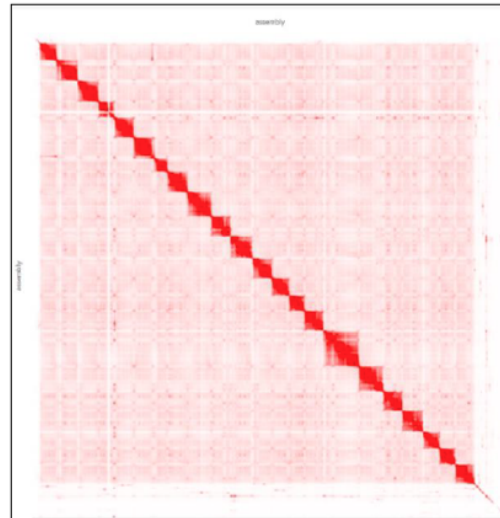

Fig. S3B. Hi-C scaffolding increased N50 lengths and gene space completeness scores.

The table shows a summary of the assemblies before scaffolding, after scaffolding with misjoin steps, and after scaffolding without misjoin steps. Disabling misjoin correction resulted in acceptable chromosome-scale genome sequences, which was validated by the formation of larger and fewer blocks in the Hi-C contact maps (scaffolding with (A) and without (B) misjoin steps), and in an increase in gene space completeness scores (table). In the final assembly, scaffolds of 10 Mb or longer comprise > 90% of the whole genome length, and the number of scaffolds matches the number of chromosomes ( $n = 22$ ) in *T. niphobles* (1).

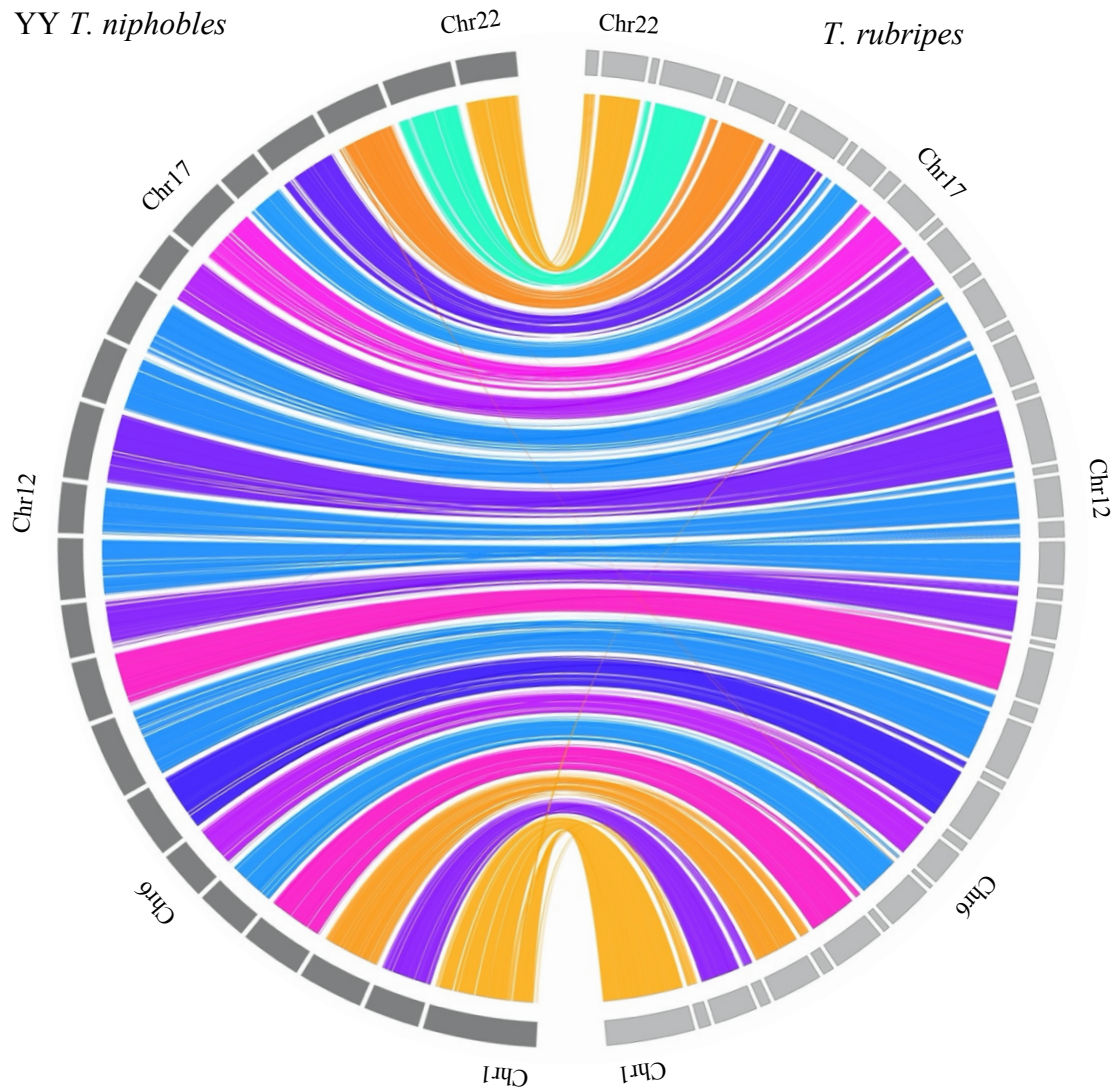

Fig. S4. Conserved synteny between the assembled genome of *T. niphobles* with the YY genotype and a reference genome sequence of fugu, *T. rubripes* (FUGU5).  
Based on conserved synteny, chromosome identities for the assembled genome of *T. niphobles* were assigned according to those of *T. rubripes*.

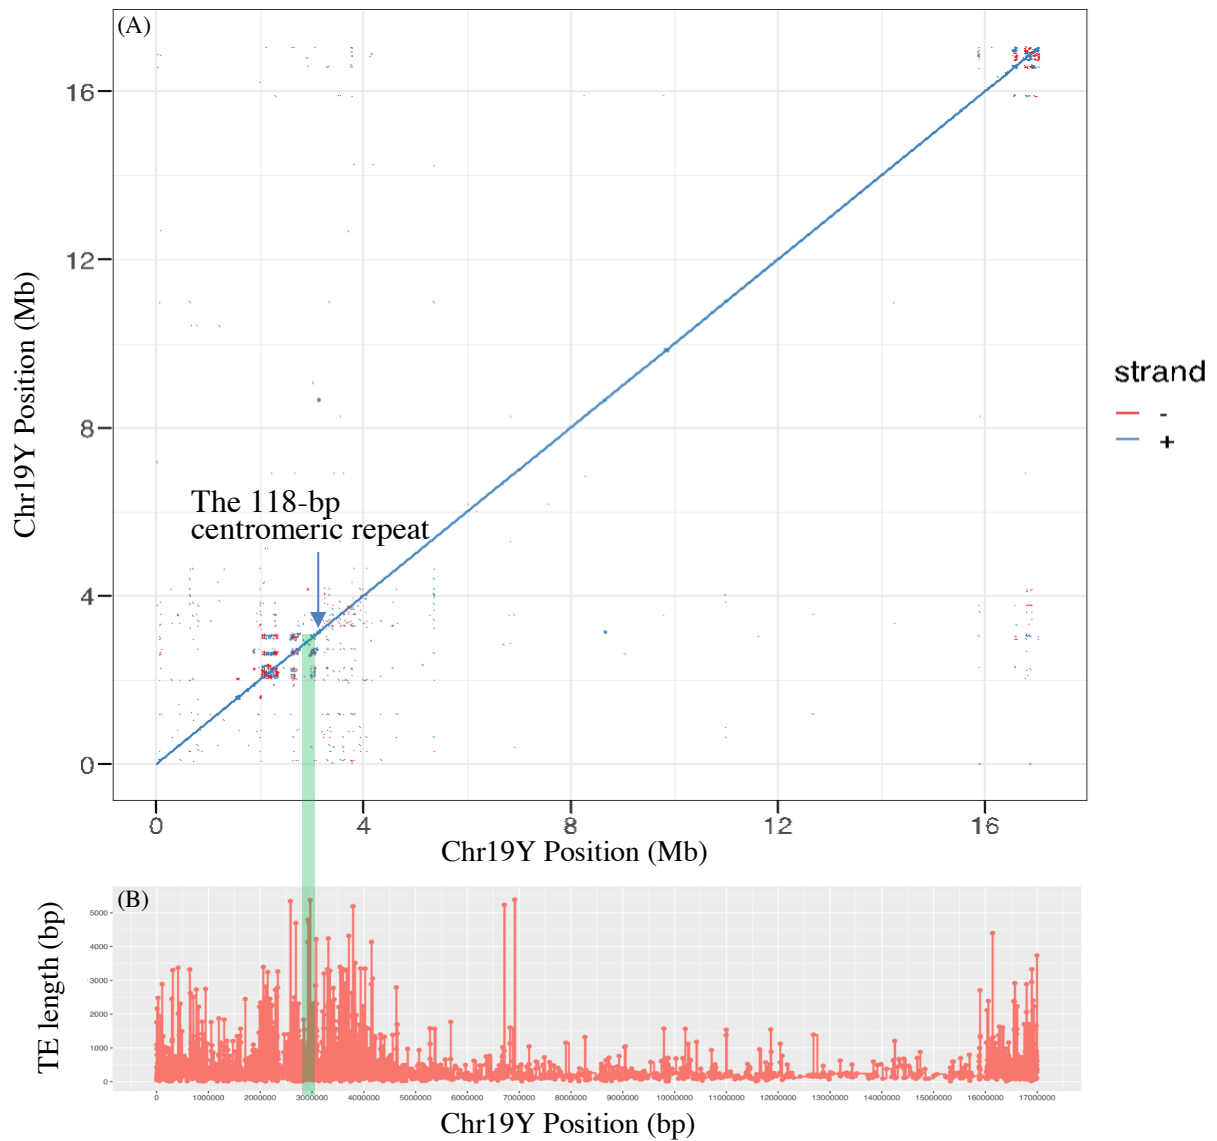

Fig. S5. (A) Dot plot of the self-comparison of Chr19Y. The presence of direct (blue) and inverted (red) repeats are visualized as the accumulation of dots off the central diagonal line. The blue arrow indicates the accumulation of a centromeric repeat. The green shadow represents the male-specific region (245 kb). Genomic position is scaled in Mb. (B) The TE length distribution across Chr19Y. Y-axis is scaled in bp.



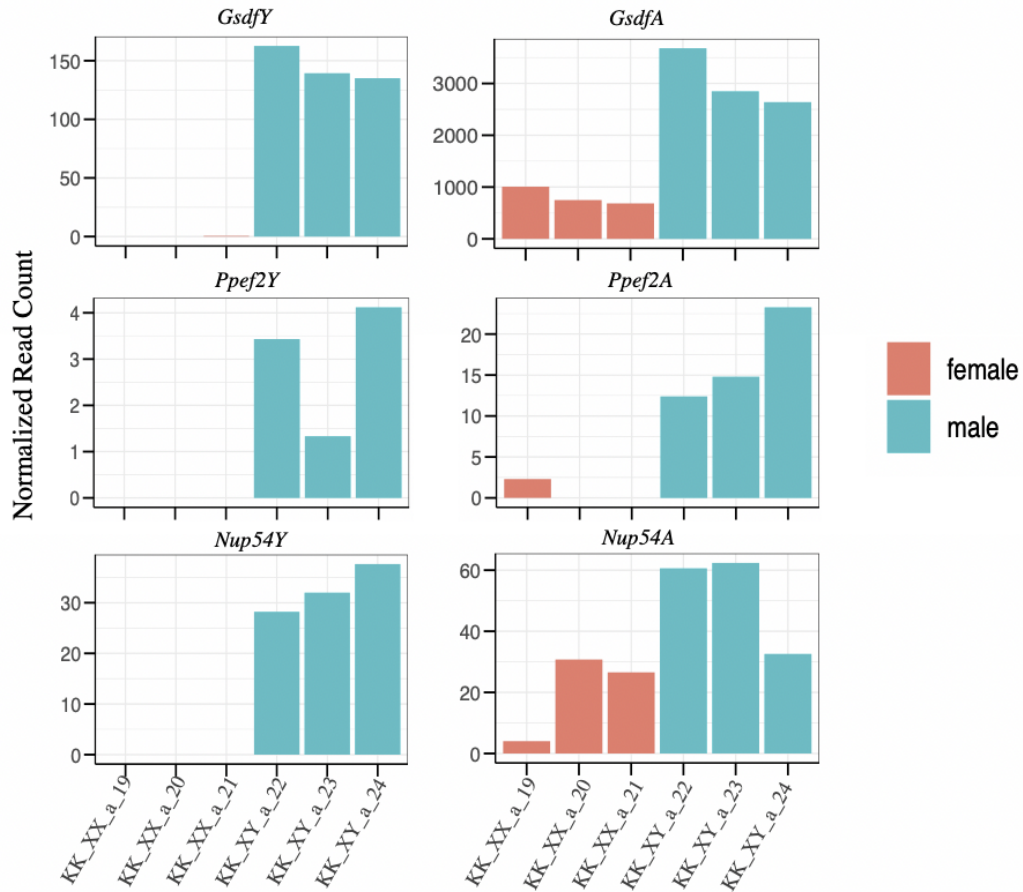

Fig. S6. Expression of the genes in the male-specific region and their autosomal paralogs in the developing gonads.

We first identified diagnostic single-nucleotide sites on the coding region of *GsdF*, *Ppef2*, and *Nup54* that could distinguish the male-specific and autosomal paralogs. We then aligned RNA-seq reads from developing gonads (90 dpf) on the reference genome of *T. niphobles* and counted the number of reads mapped on the diagnostic sites. The paralog-specific read counts across libraries were normalized for the library size (total number of paired mapped reads) and expressed per 23 M reads. The candidate sex-determining gene *GsdFY* was expressed in the developing gonads in males only. In addition, autosomal *GsdFA* was more highly expressed in males than in females (three libraries each of females and males).

| EnSpm-15 DR      | 100.0% | D                                                                                                                    | D |
|------------------|--------|----------------------------------------------------------------------------------------------------------------------|---|
| EnSpm-6 DR       | 11.5%  | LQVYQAFQEVVNLPLGSAKTR-HKLLAVYLSVANLPLHVRSDTNHMSLVLCREKDFK---EFGHARVFNLLADLKYLE-ENGLIPVSDQTV-----KGVVYCIAG--DNLGSHCIG |   |
| EnSpm-3 DR       | 38.8%  | LQVYQAFQEVVNLPLGSAKTR-HKLLAVYLSVANLPLHVRSDTNHMSLVLCREKDFK---EFGHARVFNLLADLKYLE-ENGLIPVSDQTV-----KGVVYCIAG--DNLGSHCIG |   |
| EnSpm-5 DR       | 34.8%  | LQVYQAFQEVVNLPLGSAKTR-HKLLAVYLSVANLPLHVRSDTNHMSLVLCREKDFK---EFGHARVFNLLADLKYLE-ENGLIPVSDQTV-----KGVVYCIAG--DNLGSHCIG |   |
| EnSpm-7 HM       | 11.7%  | LQVYQAFQEVVNLPLGSAKTR-HKLLAVYLSVANLPLHVRSDTNHMSLVLCREKDFK---EFGHARVFNLLADLKYLE-ENGLIPVSDQTV-----KGVVYCIAG--DNLGSHCIG |   |
| EnSpm-2 Nvi      | 14.6%  | LQVYQAFQEVVNLPLGSAKTR-HKLLAVYLSVANLPLHVRSDTNHMSLVLCREKDFK---EFGHARVFNLLADLKYLE-ENGLIPVSDQTV-----KGVVYCIAG--DNLGSHCIG |   |
| EnSpm-16 HM      | 23.6%  | LQVYQAFQEVVNLPLGSAKTR-HKLLAVYLSVANLPLHVRSDTNHMSLVLCREKDFK---EFGHARVFNLLADLKYLE-ENGLIPVSDQTV-----KGVVYCIAG--DNLGSHCIG |   |
| EnSpm-1 BF       | 15.4%  | LQVYQAFQEVVNLPLGSAKTR-HKLLAVYLSVANLPLHVRSDTNHMSLVLCREKDFK---EFGHARVFNLLADLKYLE-ENGLIPVSDQTV-----KGVVYCIAG--DNLGSHCIG |   |
| SmTnCl           | 13.0%  | LQVYQAFQEVVNLPLGSAKTR-HKLLAVYLSVANLPLHVRSDTNHMSLVLCREKDFK---EFGHARVFNLLADLKYLE-ENGLIPVSDQTV-----KGVVYCIAG--DNLGSHCIG |   |
| CACTA-1 PB       | 15.2%  | LQVYQAFQEVVNLPLGSAKTR-HKLLAVYLSVANLPLHVRSDTNHMSLVLCREKDFK---EFGHARVFNLLADLKYLE-ENGLIPVSDQTV-----KGVVYCIAG--DNLGSHCIG |   |
| CACTA-1 Dpulex   | 25.7%  | LQVYQAFQEVVNLPLGSAKTR-HKLLAVYLSVANLPLHVRSDTNHMSLVLCREKDFK---EFGHARVFNLLADLKYLE-ENGLIPVSDQTV-----KGVVYCIAG--DNLGSHCIG |   |
| CACTA-2 AA       | 24.7%  | LQVYQAFQEVVNLPLGSAKTR-HKLLAVYLSVANLPLHVRSDTNHMSLVLCREKDFK---EFGHARVFNLLADLKYLE-ENGLIPVSDQTV-----KGVVYCIAG--DNLGSHCIG |   |
| CACTA-3 AA       | 26.1%  | LQVYQAFQEVVNLPLGSAKTR-HKLLAVYLSVANLPLHVRSDTNHMSLVLCREKDFK---EFGHARVFNLLADLKYLE-ENGLIPVSDQTV-----KGVVYCIAG--DNLGSHCIG |   |
| CACTA-1 Ocineria | 13.6%  | LQVYQAFQEVVNLPLGSAKTR-HKLLAVYLSVANLPLHVRSDTNHMSLVLCREKDFK---EFGHARVFNLLADLKYLE-ENGLIPVSDQTV-----KGVVYCIAG--DNLGSHCIG |   |
| CACTA-1 Rorystae | 15.9%  | LQVYQAFQEVVNLPLGSAKTR-HKLLAVYLSVANLPLHVRSDTNHMSLVLCREKDFK---EFGHARVFNLLADLKYLE-ENGLIPVSDQTV-----KGVVYCIAG--DNLGSHCIG |   |
| CACTA-1 Miaricis | 16.7%  | LQVYQAFQEVVNLPLGSAKTR-HKLLAVYLSVANLPLHVRSDTNHMSLVLCREKDFK---EFGHARVFNLLADLKYLE-ENGLIPVSDQTV-----KGVVYCIAG--DNLGSHCIG |   |
| CACTA_TN_a       | 70.9%  | LQVYQAFQEVVNLPLGSAKTR-HKLLAVYLSVANLPLHVRSDTNHMSLVLCREKDFK---EFGHARVFNLLADLKYLE-ENGLIPVSDQTV-----KGVVYCIAG--DNLGSHCIG |   |
| CACTA_TN_b       | 42.0%  | LQVYQAFQEVVNLPLGSAKTR-HKLLAVYLSVANLPLHVRSDTNHMSLVLCREKDFK---EFGHARVFNLLADLKYLE-ENGLIPVSDQTV-----KGVVYCIAG--DNLGSHCIG |   |
| CACTA_TS_a       | 65.3%  | LQVYQAFQEVVNLPLGSAKTR-HKLLAVYLSVANLPLHVRSDTNHMSLVLCREKDFK---EFGHARVFNLLADLKYLE-ENGLIPVSDQTV-----KGVVYCIAG--DNLGSHCIG |   |
| CACTA_TS_b       | 70.6%  | LQVYQAFQEVVNLPLGSAKTR-HKLLAVYLSVANLPLHVRSDTNHMSLVLCREKDFK---EFGHARVFNLLADLKYLE-ENGLIPVSDQTV-----KGVVYCIAG--DNLGSHCIG |   |
| CACTA_TV_a       | 70.3%  | LQVYQAFQEVVNLPLGSAKTR-HKLLAVYLSVANLPLHVRSDTNHMSLVLCREKDFK---EFGHARVFNLLADLKYLE-ENGLIPVSDQTV-----KGVVYCIAG--DNLGSHCIG |   |
| CACTA_TV_c       | 70.3%  | LQVYQAFQEVVNLPLGSAKTR-HKLLAVYLSVANLPLHVRSDTNHMSLVLCREKDFK---EFGHARVFNLLADLKYLE-ENGLIPVSDQTV-----KGVVYCIAG--DNLGSHCIG |   |

Fig. S7. The catalytic center of the transposase contained in the CACTA transposon. The DDD/E triad is highlighted in orange in the protein sequence alignment and marked with blue letters according to (2, 3). CACTA\_TN\_a and CACTA\_TN\_b in *Takifugu niphobles* are 70% similar to the EnSpm-15\_DR in zebrafish in terms of the protein-coding sequences residing within the DDD/E triad. Sequences were aligned by MUSCLE (<https://www.ebi.ac.uk/Tools/msa/muscle/>) and visualized in Mview (<https://www.ebi.ac.uk/Tools/msa/mview/>). AA, BF, DR, HM, Nvi, PB, TN, TS, and TV represent *Aedes aegypti*, *Branchiostoma floridae*, *Danio rerio*, *Hydra vulgaris*, *Nasonia vitripennis*, *Phycomyses blakesleeanus*, *Takifugu niphobles*, *Takifugu snyderi*, and *Takifugu vermicularis*, respectively. The sequences except for those in *Takifugu* were found in sd01.txt at <https://www.pnas.org/doi/10.1073/pnas.1104208108#sec-1>.

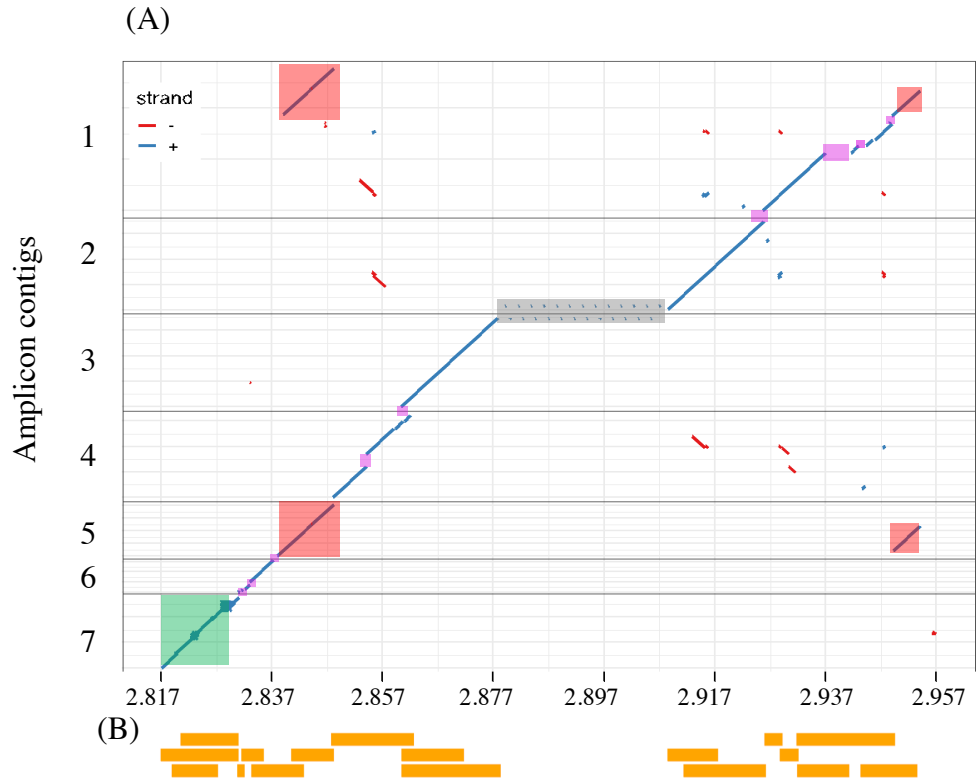

The male-specific and adjacent regions in *T. niphobles* (Mb)

Fig. S8. (A) Comparison between amplicon sequences and their targeted regions spanning the boundary between the pseudoautosomal region and the male-specific region in *T. niphobles*. Amplicon contigs were assembled using the sequences of tiled PCR products determined by Oxford Nanopore sequencing technology. No amplicons were generated in the grey shadow region due to the presence of ~30-kb repetitive sequence at the 3' end of *GsdFY* gene. Discordance between amplicon contigs and corresponding sequences on the *T. niphobles* Chr19Y assembly are shown in magenta shadows. Pink shadows indicate duplicated sequences in the male-specific region predicted from the Chr19Y assembly. The green shadow represents the pseudoautosomal region. (B) The predicted lengths of the PCR amplicons based on the Chr19Y assembly.

*T. niphobles*

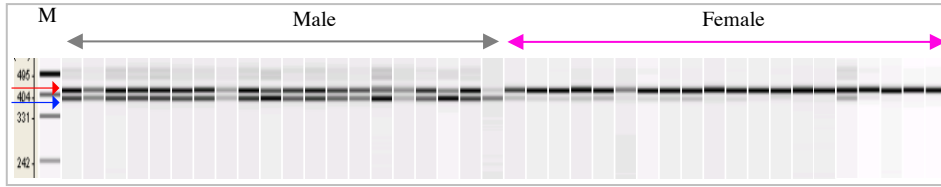

*T. snyderi*

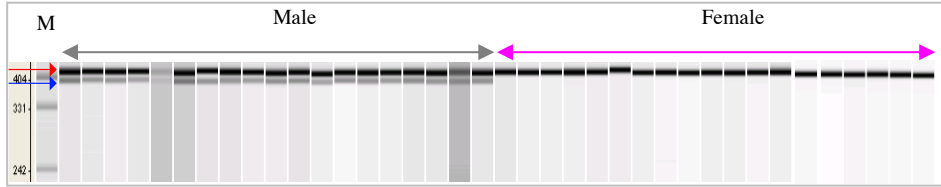

*T. vermicularis*

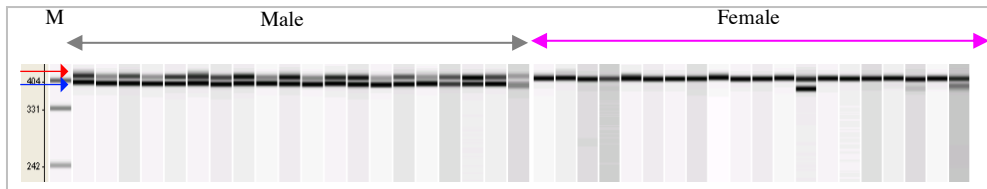

Fig. S9. The presence of the male-specific region in wild populations of *T. niphobles*, *T. snyderi*, and *T. vermicularis*.

Primer pairs that can produce paralog-specific amplicons (single-ended arrows) were used. Genotyping was performed in wild-caught individuals of each species. Amplified PCR products were analyzed on a MultiNA instrument. The lower band is associated with the male phenotype in each species. “M” denotes a set of molecular weight markers.

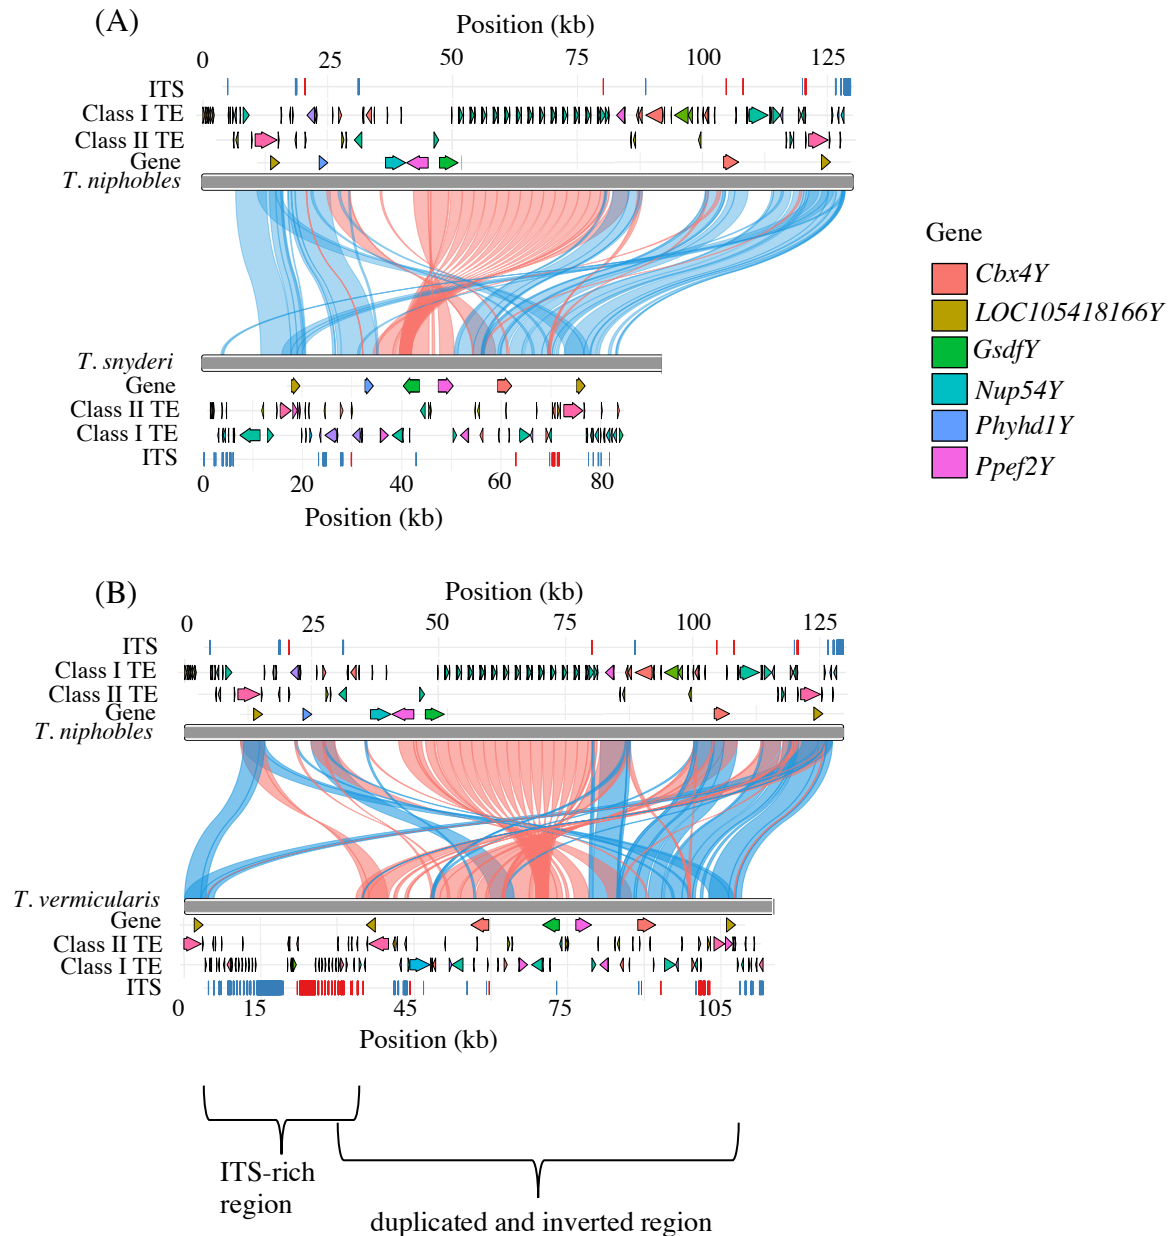

Fig. S10. Schematic representations of the repeat annotation in the male-specific region in *T. niphobles*, *T. snyderi*, and *T. vermicularis*. Arrows depict Class I transposable elements (TEs), Class II TEs, and full-length genes. Rectangles represent interstitial telomeric sequences (ITSs) (TTAGGG)<sub>n</sub>. Syntenic and inverted segments are connected by blue and red ribbons, respectively. (A) Comparison of the male-specific region between *T. niphobles* and *T. snyderi*. (B) Comparison of the male-specific region between *T. niphobles* and *T. vermicularis*.

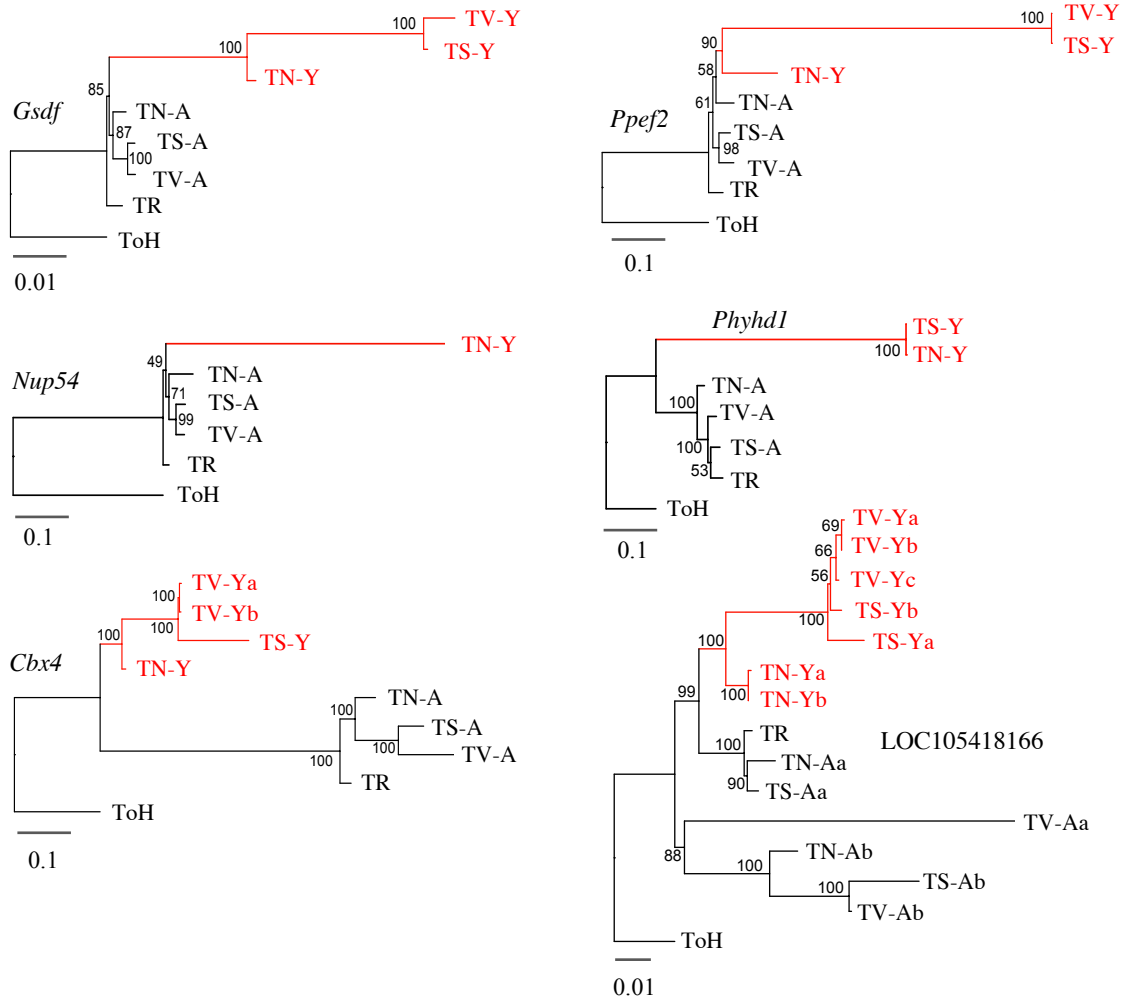

Fig. S11. Maximum-likelihood clustering of the male-specific and autosomal paralogs in *Takifugu niphobles*, *T. snyderi*, and *T. vermicularis* incorporating InDels information.

To reduce the possible effects of long-branch attraction, gaps were treated as fifth states in the multiple sequence alignment. A maximum-likelihood tree was built for each of the genes using RAxML (v. 8.0) with the MULTICAT model, GTR substitution model, and -V option. TR, TN, TS, and TV represent *T. rubripes*, *T. niphobles*, *T. snyderi*, and *T. vermicularis*, respectively. *Torquigener hypselogeneion* (ToH) sequences were used as the outgroup. The reliability of the inferred tree was tested by 1,000 fast bootstrap replicates. Red and black colors represent the male-specific (-Y) and autosomal (-A) sequences, respectively.

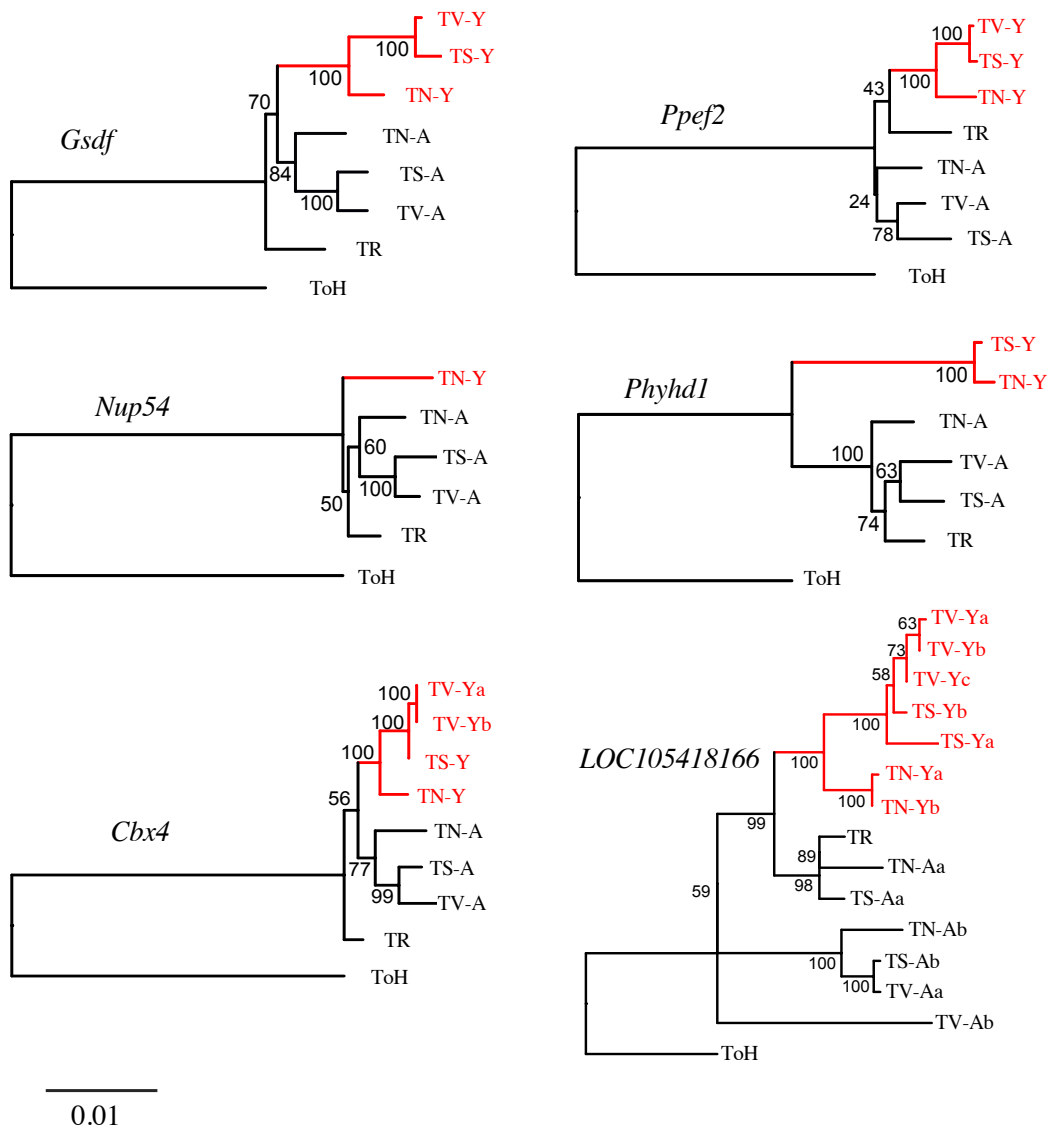

Fig. S12. Maximum-likelihood clustering of the male-specific and autosomal paralogs in *Takifugu niphobles*, *T. snyderi*, and *T. vermicularis*.

In contrast to Fig. S11, gap information was not incorporated in phylogenies. A maximum-likelihood tree was built for each of the genes using RAxML (v. 8.0) with the *GTRGAMMA* model and *--JC69* option. TR, TN, TS, and TV represent *T. rubripes*, *T. niphobles*, *T. snyderi*, and *T. vermicularis*, respectively. *Torquigener hypselogeneion* (ToH) sequences were used as the outgroup. The reliability of the inferred tree was tested by 1,000 fast bootstrap replicates. Red and black colors represent the male-specific (-Y) and autosomal (-A) sequences, respectively.

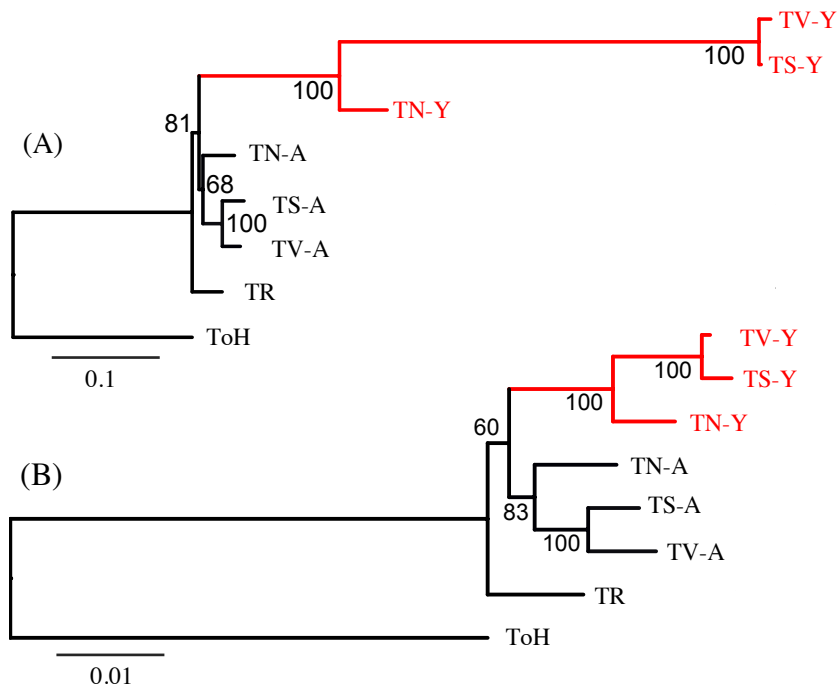

Fig. S13. Maximum-likelihood clustering for the concatenated sequence of the male-specific and autosomal *Gsdf* and *Ppef2* genes in *Takifugu niphobles*, *T. snyderi*, and *T. vermicularis*. Since segmental duplication encompassing *Gsdf*, *Ppef2*, and *Nup54* on Chr6 likely contributed to the formation of the male-specific sequence in an ancestor of the three species, we concatenated *Gsdf* and *Ppef2* sequences and constructed phylogenetic trees. Note that *Nup54* was excluded since the male-specific paralog of this gene is absent in *T. snyderi* and *T. vermicularis*. (A) The tree incorporating InDels information. We treated gaps as fifth states in the multiple sequence alignment to incorporate InDels information. The tree was built using RAxML (v. 8.0) with the *MULTICAT* model and *GTR* substitution model. (B) The tree without incorporation of the InDels information. The tree was built using RAxML (v. 8.0) with the *GTRGAMMA* model. TR, TN, TS, and TV represent *T. rubripes*, *T. niphobles*, *T. snyderi*, and *T. vermicularis*, respectively. *Torquigener hypselogeneion* (ToH) sequences were used as the outgroup. The reliability of the inferred tree was tested by 1,000 fast bootstrap replicates. Red and black colors represent the male-specific (-Y) and autosomal (-A) sequences, respectively.



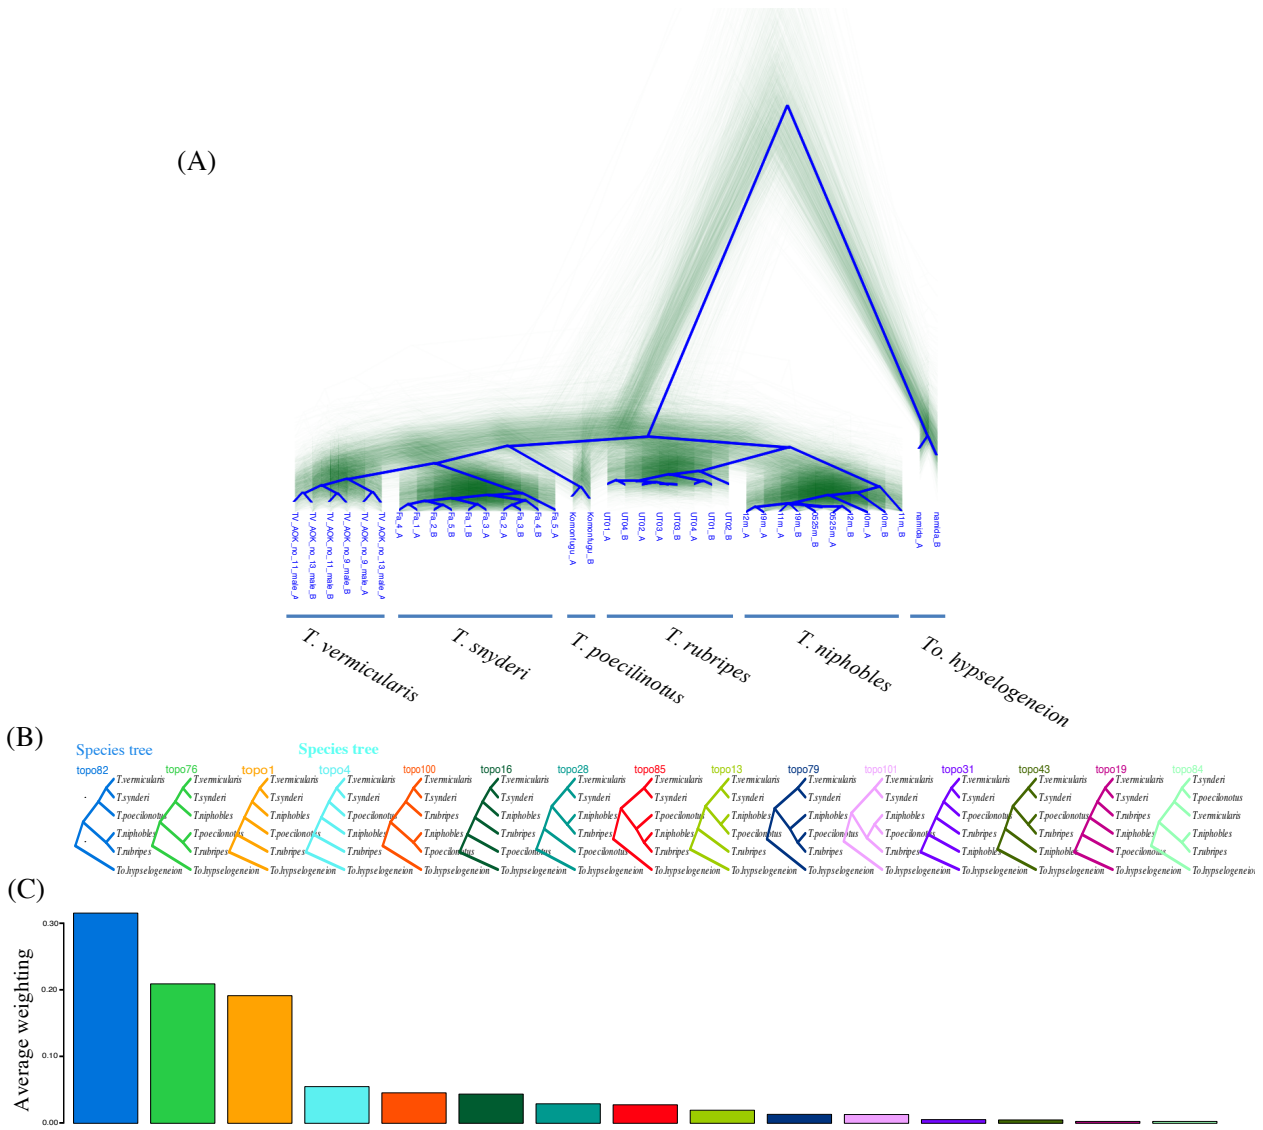

Fig. S14. Topology weighting identifies widespread phylogenetic discordance.

We investigated variations in species relationships across the genomes of *T. rubripes*, *T. niphobles*, *T. snyderi*, *T. vermicularis*, and *T. poecilonotus* in windows of 2,000 SNPs using TWISST, which assessed the weighting of alternative topological relationships among the species. *Torquigener hypselogeneion* was used as the outgroup. (A) Rooted consensus tree. Two thousand subsampled species trees are plotted with the consensus tree. (B) The 15 most abundant potential rooted topologies represent phylogenetic relationships among five in-group taxa. (C) The topology weightings for each of the 15 most abundant topologies in panel B, averaged across 2,000 SNP windows across the genome. The topology weighting indicates that large-scale phylogenetic discordance has shaped the relationships among these species. The 15 most abundant topologies represent 93% of the 105 potential topologies that describe the relationships between the five species. Of the 15 most abundant topologies, the most common are topo82, topo76, topo1, and topo4. The topo82 and topo4 topologies are consistent with the species tree estimated by RAxML (Fig. 1A), in which *T. poecilonotus*, *T. snyderi*, and *T. vermicularis* are monophyletic sister taxa. By contrast, topo76 and topo1 are alternative topologies in which *T. niphobles*, *T. snyderi*, and *T. vermicularis* are monophyletic sister taxa.

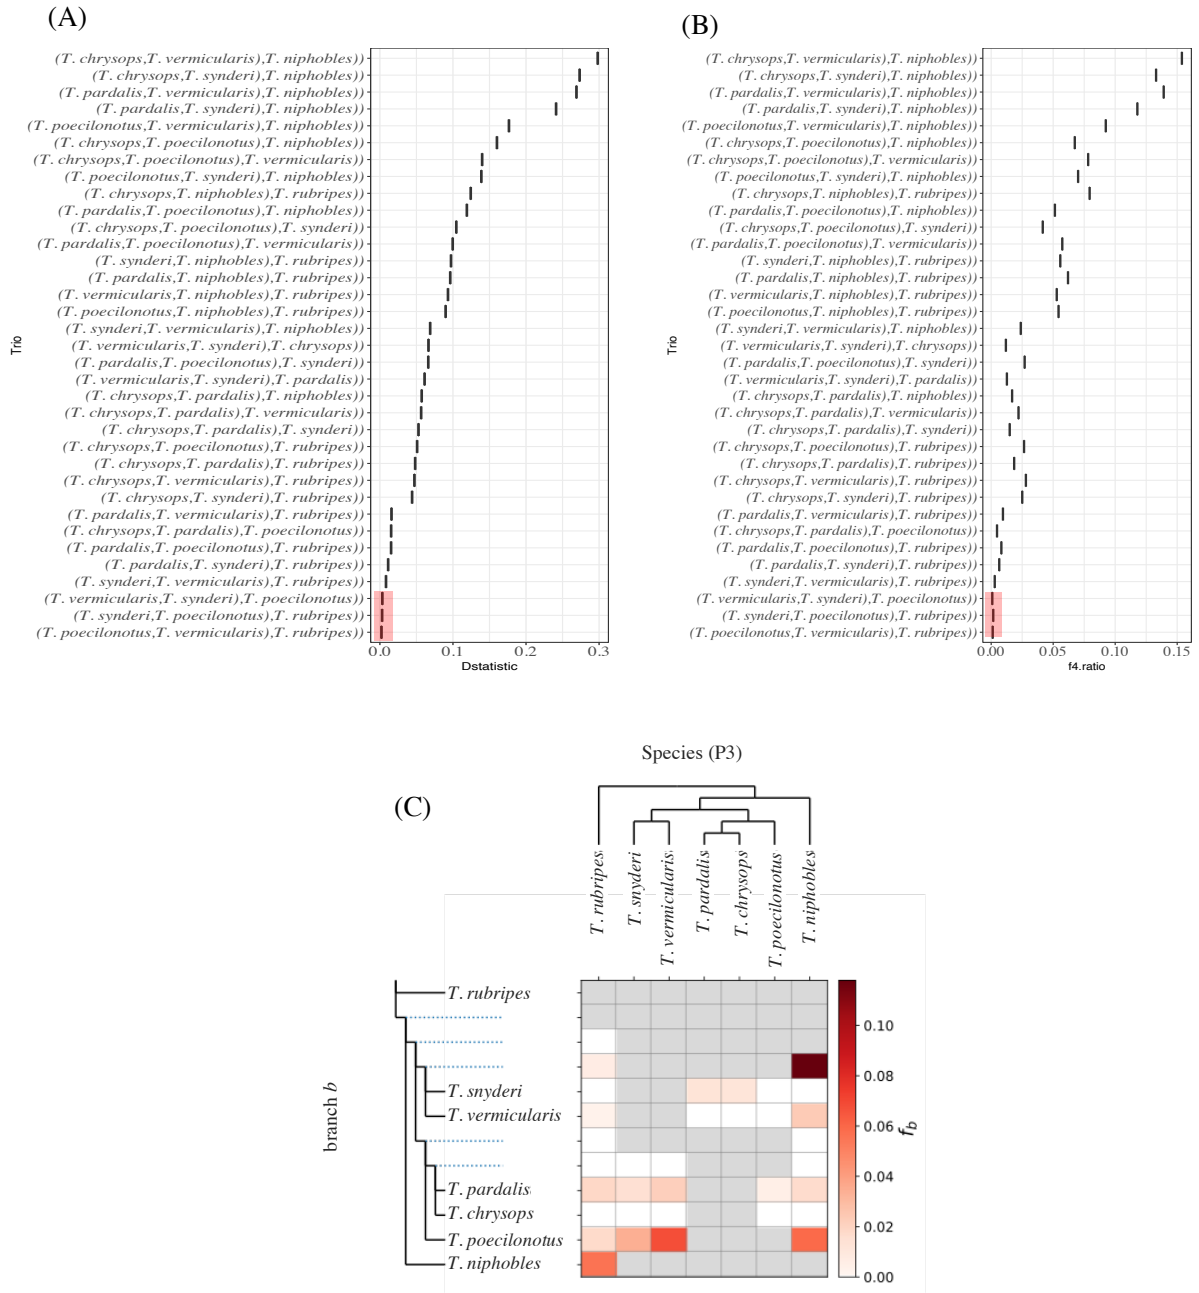

Fig. S15. Past introgression implied by  $D$  statistics and  $f_i$ -ratio statistics.  $D$  statistics and  $f_i$  ratio statistics for all taxon trio combinations guided by the species tree (Fig. 1A) of *T. rubripes*, *T. niphobles*, *T. poecilnotus*, *T. snyderi*, *T. pardalis*, *T. chrysops*, and *T. vermicularis*. *Torquigener hypselogeneion* was used as the outgroup for all trio combinations. (A)  $D$  statistics. (B)  $f_i$ -ratio statistics. Red shades in (A) and (B) show the trios with non-significant statistics. The  $P$ -values for each quartet were corrected for multiple testing using the Bonferroni method. (C) The heatmap represents the scores of  $f_b$ -branch statistics showing the excess allele sharing between the species pairs. The  $f_i$ -ratio values were mapped to internal branches for the given species tree using the  $f_b$ -branch method. Both the  $D$  statistics and  $f_i$ -ratio statistics support past introgression when they significantly differ from zero. The most extreme  $D$  and  $f_i$  values are

observed in quartets in which *T. chrysops* or *T. pardalis* is in position 1, and *T. niphobles* in position 3, and *T. vermicularis* ( $D = 0.29, 0.26$ ;  $f_i = 0.154, 0.139$ ) or *T. snyderi* ( $D = 0.27, 0.24$ ;  $f_i = 0.133, 0.118$ ) in position 2, suggesting a substantial amount of gene sharing between *T. niphoble* and *T. vermicularis*, and *T. niphoble* and *T. snyderi*. Moreover, the result of the  $f$ -branch test suggested that a strong gene flow occurred in the past between *T. niphobles* and the last common ancestor of *T. snyderi* and *T. vermicularis*.

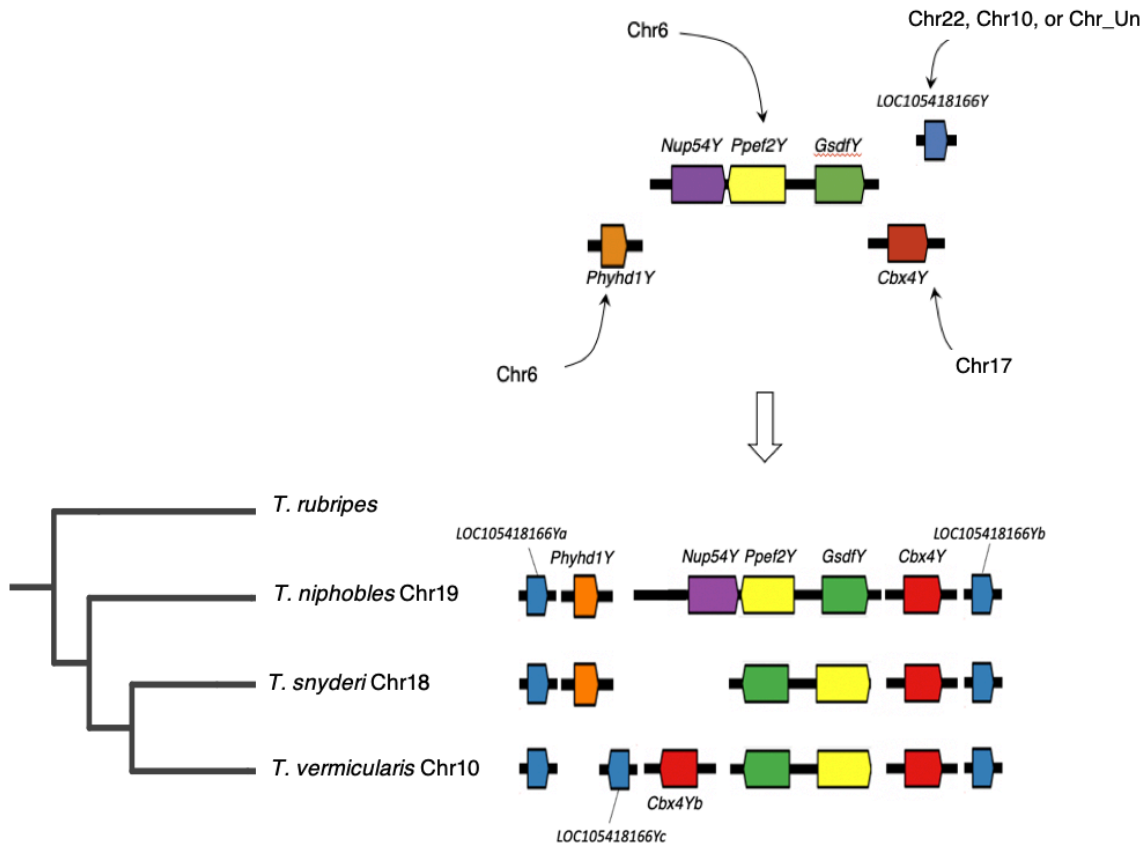

Fig. S16. A hypothetical model for the evolutionary development of the core male-specific region. It is likely that the core male-specific region evolved in the common ancestor of the three species through the combination of at least two processes. One includes segmental duplication of the region encompassing *Nup54*, *Ppef2*, and *Gsd* and the translocation of this region to the future sex chromosome. The other process is the gathering of other unlinked genes (*Phyhd1*, *Cbx4*, and *LOC105418166*) through independent duplications and translocations. *Nup54Y* was likely lost before the divergence of *T. snyderi* and *T. vermicularis*, while the gene content was retained in the lineage leading to *T. niphobles*. Then, in the *T. vermicularis* lineage, while *Phyhd1Y* was lost, the segmental duplication of part of the male-specific region resulted in the emergence of *LOC105418166Yc* and *Cbx4Yb*.

References for Supplementary Figures.

1. K. Miyaki, O. Tabeta, H. Kayano, Karyotypes in six species of pufferfishes genus *Takifugu* (Tetraodontidae, Tetraodontiformes). *Fish. Sci.* **61**, 594-598 (1995).
2. Y. W. Yuan, S. R. Wessler, The catalytic domain of all eukaryotic cut-and-paste transposase superfamilies. *Proc. Natl. Acad. Sci. U. S. A.* **108**, 7884–7889 (2011).
3. V. V. Kapitonov, J. Jurka, A universal classification of eukaryotic transposable elements implemented in Repbase. *Nat. Rev. Genet.* **9**, 411-412 (2008).

## Supplementary text

### Supplementary Materials and Methods

#### 1. Linkage mapping

##### 1-1. Genotyping of SNP markers in *T. snyderi*

Reads were trimmed using Trimmomatic (v. 0.36) (1) as described in (2), and mapped onto a reference genome sequence of *T. rubripes* (fugu), FUGU5 (3) (GenBank: GCA\_000180615.2) using BWA-MEM (4) with the default parameters. SNP calling was performed using GATK HaplotypeCaller (v. 3.8) (5) with the default setting. VCFtools (v. 0.1.14) (6) was used to extract SNPs meeting the following criteria: minor allele frequency between 0.1 and 0.4, genotyped for  $\geq 90\%$  of individuals, allele count of two, and minimum depth of 10. The SNP loci heterozygous in both parents were removed. The sequence data were registered in the DDBJ SRA ([Accession No. DRA012888](#)) The genotype information is provided in [SI \(mapping genotype.xlsx\)](#).

##### 1-2. Linkage map construction and mapping of the sex-determining locus in *T. snyderi*

The male and female linkage maps were constructed based on the paternally and maternally inherited alleles at marker loci, respectively, using the R/qtl package (v. 1.41) (7). Linkage groups were inferred with the *formLinkageGroups* function ( $\text{max.rf} = 0.45$ ,  $\text{min.lod} = 6.0$ ), and the markers were ordered by the *orderMarkers* function. Linkage groups with fewer than five loci were excluded from the subsequent analysis. The sex-determining locus was analyzed by the interval mapping implemented in R/qtl as described in (8). The genome-wide significance level was determined with a permutation test with 10,000 permutations (9). The chromosome and linkage group identities of *T. snyderi* were assigned based on synteny with those of *T. rubripes* established in (3).

#### 2. Phylogenetic framework

##### 2-1. Genome sequencing

In order to generate a species phylogenetic tree, whole-genome resequencing data were obtained from 12 *Takifugu* species and one outgroup (one individual per species): *Takifugu rubripes*, *T. snyderi*, *T. vermicularis*, *T. niphobles*, *T. pardalis*, *T. poecilonotus*, *T. chrysops*, *T. stictonotus*, *T. obscurus*, *T. ocellatus*, *T. xanthopterus*, *T. porphyreus*, and *Torquigener hypselogoneion* (outgroup). Genomic DNA was extracted from the caudal fin using the Genra Puregene tissue kit (Qiagen). The TruSeq DNA PCR-free Kit (Illumina) was used to construct the libraries (one library per sample) (150-, 100-, or 90-bp paired-end reads). Library preparation and whole-genome sequencing were performed with HiSeq 2000, HiSeq 2500, or HiSeq X Ten platforms at the NODAI genome research center, National Institute of Genetics, or BGI Corporation. Summary statistics of sequencing data are described in [Table S4](#). The data have been registered in the DDBJ SRA ([Accession No. DRA012890](#) and

DRA012891). Whole-genome resequencing data of *T. rubripes* were obtained from (10) (Accession No. DRA007464 in DDBJ SRA).

## 2-2. Genotyping and construction of species tree

Reads were trimmed with Trimmomatic (v. 0.36) (1) using the following parameters: ILLUMINACLIP TruSeq3-PE-2.fa:2:30:10, LEADING:10, TRAILING:10, SLIDING WINDOW:30:20, AVGQUAL:20, and MINLEN:80, MINLEN:90, or MINLEN:140. Then, the read pairs that survived at both paired ends were mapped onto the FUGU5 assembly using BWA-MEM (4) with the default parameters. We marked the PCR duplicated reads and filtered out secondary reads using SAMtools (v. 1.9) (11). SNP calling from mapped reads was done using Freebayes (v. 1.3.1) (12) with the following settings: min-mapping-quality = 30, use-best-n-alleles = 4, min-alternate-count = 2, min-alternate-fraction = 0.2, min-coverage = 4, and ploidy = 2. Variant filtering was done by *vcffilter* from *vcflib* (<https://github.com/vcflib/vcflib>) using the following parameters: QUAL / AO > 20 & SAF > 0 & SAR > 0 & RPR > 1 & RPL > 1. InDels were excluded from all individuals. Variants residing in the gaps, repeats, and non-oriented scaffolds in FUGU5 were subsequently eliminated. We defined “divergent sites” as the loci where genotypes were homozygous for the derived alleles. These sites (12,983,719 in total) were concatenated and subjected to a phylogenetic analysis using RAxML (v. 8.0) (13) with the *ASC\_GTRCAT* model and *-V* option. The reliability of the inferred tree was tested by 1,000 fast bootstrap replicates.

## 3. *k*-mer analysis of *T. niphobles*, *T. snyderi*, and *T. vermicularis*

### 3-1. Samples and resequencing

For the *k*-mer analysis, we sequenced six females and five males of *T. niphobles* from Lake Hamana (Shizuoka Prefecture, Japan), three pools (eight individuals per pool) each of male and female *T. snyderi* from Suruga Bay, and four females and four males of *T. vermicularis* from Ariake Sea (Table S5). Phenotypic sex was visually determined under a microscope. Genomic DNA extraction and library preparation were carried out as described above. Sequencing was performed using HiSeq 2000, HiSeq 2500, or HiSeq X Ten by BGI Corporation or MacroGen Corporation. A summary of the sequencing statistics is presented in Table S5. (Accession No. DRA012877, DRA012889, DRA012878 in DDBJ SRA).

### 3-2. *k*-mer counting

We counted 35-mer occurrences in each individual (*T. niphobles* and *T. vermicularis*) or each sample pool (*T. snyderi*) using Jellyfish (v. 2.2.6) (14), followed by quality trimming with Trimmomatic (v. 0.36) (1) as described above except for the use of the option MINLEN:140. The “dump” subcommand

was executed to output all 35-mers for each of the samples/pools. The male-specific 35-mers were extracted by comparing females and males. Reads containing the male-specific 35-mers and their read pairs were extracted from the original FASTQ files and assembled into contigs by MetaPlatanus (v. 1.2.2) (15) with a default setting. Contigs assembled with depths of coverage ranging from 9 to 200 (*T. niphobles*), 18 to 500 (*T. snyderi*), or 9 to 300 (*T. vermicularis*) were retained.

### **3-3. Annotation of the male-specific sequences obtained by the *k*-mer approach**

To characterize the male-specific sequence in *T. niphobles*, *T. snyderi*, and *T. vermicularis*, we first took advantage of a well-annotated fugu genome (FUGU5). We masked repetitive sequences in the contigs using a FUGU5 repeat annotation database, and conducted a BLASTn search (16, 17) of the contigs against FUGU5 was conducted with a word\_size of 50. We retained the genes meeting one or more of the following criteria: genes on which more than two contigs hit, genes on which two contigs covering at least 40% of the sequence hit, or genes on which a single contig covering at least 50% of the sequence hit. Contigs hitting these genes were then reassembled using the CAP option (Contig Assembly Program) of BioEdit (v. 7.2.5) (18).

## **4. Genome assembly in a *T. niphobles* YY male**

### **4-1. Hybrid genome assembly and Hi-C scaffolding of the *T. niphobles* genome**

Illumina short reads and PacBio long reads of the YY male were deposited in DDBJ SRA under the accession number [DRA012992](#). Illumina reads were trimmed with Trimmomatic (v. 0.36) (1) using the following parameters: ILLUMINA\_CLIP TruSeq3-PE-2.fa:2:30:10, LEADING:10, TRAILING:10, SLIDING WINDOW:30:20, AVGQUAL:20, and MINLEN:240, and the resulting reads were assembled with SparseAssembler (v. 20160205) (19) into contigs with k-mer size = 51 and skip length = 15. The contiguity of the short-read assembly was improved by anchoring the contigs to the PacBio long reads using DBG2OLC (v. 20180222) (20) with *k*-mer size = 17, minimum overlap = 30, and AdaptiveTh = 0.01. After removing chimeric reads with the option of *ChimeraTh* = 1, we obtained an initial hybrid assembly. Because raw PacBio long reads are prone to contain errors, we corrected potential sequencing errors in the initial assembly by realigning the long reads and the Illumina contigs using Sparc (v. 20160205) (21). We also aligned the long reads to the assembly with pbalgn (v. 0.4.1) (<https://github.com/PacificBiosciences/pbalgn/>) using the BLASR (v. 5.3.1) (22) algorithm and polished it with Arrow (v. 2.3.3) with the `-minCoverage 12` option (23). For error correction at the base level, Illumina reads were aligned to the assembly using BWA-MEM (4), and the assembly was polished three times with Pilon (v. 1.22) (24). For long-read-only assembly, the Minimap2/Miniasm pipeline (25, 26) was used. In brief, a Pairwise Mapping Format (PAF) file was generated using Minimap2 with the `-x ava-pb` option. The PAF file was converted into an assembly graph as a



Graphical Fragment Assembly (GFA) format file using Miniasm. Then, a *de novo* assembly sequence (unitig) was extracted from the GFA file. The long reads were mapped to the unitig sequences using Minimap2, and three rounds of consensus corrections were performed using Racon (v. 1.3.0) (27). The resultant assembly was polished three times with Pilon as described above. Finally, the hybrid assembly and long-read-only assembly were merged using Quickmerge (v. 0.2) (28), employing the latter as the query assembly. The merged assembly was then merged to the long-read-only assembly to produce a more contiguous assembly. Furthermore, Hi-C data from an XY male individual were used to scaffold this merged genome. An overview of the genome assembly is shown in Fig. S2.

#### **4-2. Tissue collection, Hi-C sequencing, and Hi-C scaffolding of the *T. niphobles* genome**

The liver tissue was dissected from an XY male *T. niphobles* and frozen in liquid nitrogen. Sample fixation, chromatin isolation, Hi-C library preparation, and post-sequencing quality control were performed following the iconHi-C protocol using the DpnII restriction enzyme (29) (Fig. S3A). Quality control of the post-ligated DNA (Hi-C DNA) and the Hi-C library was performed based on the DNA size shift as described in (29) (Fig. S3A). Sequencing of the Hi-C library was performed on an Illumina HiSeq X Ten platform with 151-bp paired-end reads, yielding approximately 92 million read-pairs. Post-sequencing quality control of the Hi-C library was performed by HiC-Pro (v. 2.11.1) (30) using one million subsampled read-pairs from the large-scale sequencing data (Table S10). After removing low-quality and adapter sequences using Trim Galore (v. 0.6.0) ([https://www.bioinformatics.babraham.ac.uk/projects/trim\\_galore/](https://www.bioinformatics.babraham.ac.uk/projects/trim_galore/)), the trimmed reads were mapped to the Quickmerged assembly using Juicer (v. 20190226) (31). Using the Juicer output, Hi-C scaffolding was performed using 3D-DNA (v. 20180929) (32) without the misjoin-correction step ( $i = 12,000$  and  $r = 0$ ) (Fig. S3B). The Hi-C dataset was deposited in DDBJ SRA under the accession number [DRA012992](#). The resultant scaffolded assembly was used for the following analysis.

#### **4-3. Gene annotation of the *T. niphobles* genome**

Gene annotation was conducted using MAKER (v. 3.01.02) (33), which utilizes both evidence-based methods and ab initio predictions. For the evidence-based annotation, the RNA-seq data of XY *T. niphobles* and the annotated protein sequences from FUGU5 were used with default parameters. RNA-seq data of XY *T. niphobles* were generated on an Illumina HiSeq 2000 platform at Novogene (Tokyo, Japan). Sample collection, RNA extraction, library preparation, and sequencing strategies are described in Section 5. RNA-seq in *T. niphobles*. The ab initio annotation was performed using SNAP (34), trained on the gene model from the evidence-based annotation, and AUGUSTUS (35), trained on the Actinopterygii gene model (36) from BUSCO (v. 3.0.2). The curated libraries of repeats for *T.*

*niphobles* were also used for the annotation (see details of the repeat annotation in Section 6. Repeat annotation of the *T. niphobles* genome).

#### **4-4. Repeat annotation of the *T. niphobles* genome**

To identify repeat families in the assembly, a de novo repeat library was constructed using RepeatModeler (v. 1.0.11) (37) with RECON and RepeatScout (38, 39). Full-length, long terminal repeat retrotransposons were identified using *LTRharvest* and *LTRdigest* (40, 41). MITE-Hunter was used to identify the miniature inverted-repeat transposable elements (42). Tandem Repeats Finder was used to identify the simple, low-complexity, and satellite repeats (43). The annotated repeat sequences from zebrafish in Repbase (44) were also used. With these repeat libraries, we identified the repeat region in the de novo genome assembly using RepeatMasker (v. 4.0.7) (<http://www.repeatmasker.org>).

#### **4-5. Assembly quality assessment**

The quality of the assemblies was assessed by gVolante (v. 1.2.1) (45) with BUSCO (v. 3.0.2) (36) and the ortholog gene set of Actinopterygii. In addition, the quality of the Hi-C–based proximity-guided assembly was evaluated by mapping the Illumina short reads (sample IDs: 19m, 12m, 10m, 11m, and 0525m in [Table S5](#)) to the assembled genome using BWA-MEM with default parameters. A comparison of this genome assembly with that of *T. rubripes* (FUGU5) was also conducted (see details in the below.).

#### **4-6. Comparison of genome assemblies of *T. niphobles* and *T. rubripes***

We examined the level of conserved synteny between *T. niphobles* and *T. rubripes* (FUGU5) using the nucmer algorithm implemented in MUMmer (v. 4.0) (46) with option -l 100 -c 100. Synteny blocks longer than 5 kb with 95% sequence identity were visualized by Circos Plot using circos (v. 0.69-7) (47). Based on the conserved synteny between the two species and the genomic positions of the sex-linked markers reported previously (8), we identified the pseudochromosome corresponding to the sex chromosome of *T. niphobles* and denoted it Chr19Y. To find the centromere on Chr19Y, the following centromeric repeat reported in *T. rubripes* (3) was BLAST searched against the genome assembly of *T. niphobles*:

```
“ACGAGAAAACGTCAAAAACGTCATAATGTGAGCGCAGCATGAGTTTTTCAGGTGATCATG  
TTGAATTTACCTCTGTTTTGAGAACTTGTATATCCTGACCAAAAAGTGATGGTTTCCCC.”
```

### **5. RNA-seq in *T. niphobles***

#### **5-1. RNA extraction and sequencing**

To obtain transcriptomic data from the differentiating gonads of *T. niphobles*, we produced one family from a pair of wild-caught parents collected from Lake Hamana. Conditions for rearing and feeding fish were set as above. The genotypic sex of siblings was inferred by sex-linked microsatellite markers (f1413, fi-4, f1595, and f645) (8). Fish samples at 90 dpf were dissected, and gonads were preserved in RNAlater solution (Qiagen). The observation of sectioned gonads stained with hematoxylin and eosin suggested that the gonads were in an early stage of morphological differentiation of the ovary and testis. Total RNA from the gonads was extracted with TRIzol (Invitrogen). TURBO (Thermo Fisher Scientific) was used to remove the genomic DNA from total RNA. Because a sufficient amount of total RNA was not obtained from the gonads, the same amount of total RNA from three individuals with the same genotypic sex was pooled for each library preparation. The average body lengths of the XX and XY fish were 30.8 mm (SD = 1.5 mm, n = 9) and 28.5 mm (SD = 1.4 mm, n = 9), respectively. Library preparation and paired-end sequencing (~4 Gb/pool) were performed on an Illumina HiSeq 2000 platform at Novogene. Summary of the RNA-seq data is presented in [Table S14](#). Raw reads were trimmed by removing adapters and low-quality reads as described above except for the use of the option MINLEN:140. Then all sequences were aligned to the reference *T. niphobles* genome sequence using HISAT2 (v. 2.0.4) with the options of -k 1, --no-mixed, and --no-discordant (48). The data were registered in the DDBJ SRA ([Accession No. DRA012876](#)).

## **5-2. Expression of male-specific genes in the developing gonads**

The expression of the male-specific paralogs in the developing gonads was examined from the RNA-seq data obtained above. For this purpose, the diagnostic nucleotide sites that can distinguish transcripts from the male-specific sequences and their autosomal paralogs were identified. This was done manually on IGV (v. 2.11.1) (49). Then, the number of reads with and without the diagnostic sites were counted from the HISAT2 output file (BAM file) using the AESReadCounter function implemented in GATK4 (5). The paralog-specific read counts were normalized for the total number of paired mapped reads in each library and expressed per 23 M reads. Because the diagnostic sites on the coding region of the paralog pair were only found in *Gsdf*, *Ppef2*, and *Nup54*, the paralog-specific expressions were not assessed for *Phyhd1Y*, *Cbx4Y*, *LOC105418166Y*, *Cyc1*, *Hipk1a*, *Hipk1b*, *Hipk1c*, *Hipk1d* or *Ffra2*.

## **6. Characterization of the male-specific region**

### **6-1. Samples and additional resequencing of *T. niphobles***

For a comparison of the relative depth of read coverage between males and females, we sequenced an additional two females and four males of *T. niphobles* from Lake Hamana. Phenotypic sexing and genomic DNA extraction were carried out as described above. Library preparation and sequencing on

HiSeq 2000 platform were performed by BGI Corporation (Kobe, Japan). Information about the sequencing statistics is presented in [Table S5](#). These reads were trimmed by removing adapters and low-quality reads as described above, with either the MINLEN:80 (m8, m, m30, and m31) or MINLEN:140 (35fe and 11fe) option. The data were registered in the DDBJ SRA ([Accession No. DRA012877](#)).

### **6-2. Comparison of the relative depth of read coverage between males and females**

To determine the male-specific region in the genome assembly of the *T. niphobles* YY male, we mapped the resequencing data of 10 males and 8 females ([Table S5](#)) onto the *T. niphobles* reference sequence using BWA-MEM (4) with default settings, and compared the relative depth of coverage between sexes. To count the depth, we used Mosdepth (v. 0.3.0) (50) with a 1-kb window size and excluded regions with depth greater than 70x. Mean coverage values were calculated separately for females and males, after normalization of each sample with the genome coverage. The male-to-female coverage ratio was calculated as (average male coverage+1) / (average female coverage+1).

### **6-3. Characterization of the male-specific region**

To identify duplicate and satellite sequences within the male-specific region, the sequences of the male-specific region were aligned against themselves using BLASTn with the “word\_size 50” option. To test if the male-specific region comprised segments that were duplicated and translocated from other regions of the genome, we first masked repetitive sequences from the two male-specific regions using the repeat database of *T. niphobles* YY genome assembly. We then performed a BLAST search of the male-specific region against the reference genome of *T. niphobles*, and then aligned the male-specific region to the genome assembly of *T. niphobles* using the nucmer algorithm with option -l 50 -c 65 implemented in MUMmer (v. 4.0) (46). We restricted our analyses to the genic regions and visualized synteny blocks longer than 300-bp with 90% sequence identity.

### **6-4. Verification of the assembled male-specific sequence of *T. niphobles* by short- and long-range tiling PCR**

To verify the overall accuracy of the assembly for the male-specific region and its adjacent pseudoautosomal regions, we used tiling-path PCR combining long- and short-range PCRs. We first designed primers for short-range PCRs around the genomic position Chr19Y: 2.828 Mb to 2.955 Mb ([Table S15](#)). No PCR primers were constructed for the region from 2.879 Mb to 2.909 Mb due to the presence of large repeated sequences at the 3' ends of *GsdY* gene. The region from 2.956 Mb to 3.118 Mb was also highly repetitive; therefore, it was not possible to design primers for this region either. PCRs were carried out in a total reaction volume of 15  $\mu$ l containing 0.3  $\mu$ l (10  $\mu$ M) of each primer,

1.5  $\mu$ l of Takara 10X PCR buffer (Mg<sup>2+</sup> plus), 1.2  $\mu$ l of 2.5 mM dNTP mixture (Takara Bio), 0.15  $\mu$ l of Taq DNA Polymerase, 10.55  $\mu$ l DW and 1  $\mu$ l (~30 ng) of genomic DNA. PCR reactions were operated on a BIO-RAD T100 thermal cycler (Bio-Rad), under the following thermal conditions: initial denaturation at 94°C for 3 min, followed by 35 cycles at 94°C for 30 s and 64.5°C for 3.3 min, and a final one-cycle elongation step at 64.5°C for 5 min. The primers for long-range PCR were selected from those that were successful in the short-range PCR amplification. We also identified additional primer sequences from the adjacent regions of the male-specific sequence. In total, 12 and 5 primer pairs targeting the ~110-kb male-specific and adjacent regions, respectively, were selected (Table S15). PCRs were carried out with KOD One PCR Master Mix (Toyobo). In brief, the amplification was performed in 10  $\mu$ l of KOD One 2 $\times$  PCR Master Mix, 8  $\mu$ l of DW, 0.5  $\mu$ l (10  $\mu$ M) of each primer, and 1  $\mu$ l (~30 ng) of genomic DNA in a total reaction volume of 20  $\mu$ l. PCR reactions were carried out on a BIO-RAD T100 thermal cycler (Bio-Rad, CA, USA) under the following thermal conditions: initial denaturation at 94°C for 2 min, 5 cycles of 94°C for 10 s and 74°C for 5 min, 5 cycles of 94°C for 10 s and 72°C for 5 min, 5 cycles of 94°C for 10 s and 70°C for 5 min, 25 cycles of 94°C for 10 s and 68°C for 5 min, and final extension at 68°C for 5 min. In total, 17 long-range PCR amplicons were generated. To determine the sequences of long-range PCR amplicons, we used Oxford Nanopore sequencing technology. The amplicons were purified with AmpureXP beads and pooled in a single tube. Sequencing was carried out using a single GridION cell with the Ligation Sequencing Kit 1D (SQK-LSK109) at Genebay. Basecalling was performed using Guppy (v. 3.0.3) (<http://nanoporetech.com>) and adapter trimming was conducted with Porechop (v. 0.2.3) (<https://github.com/rrwick/Porechop.git>), followed by a quality trimming step using fastp (-q 7) (51). In total, 1.09-Gb (yielded reads = 192,777; N50 = 8 kb) was sequenced, resulting in approximately ~9000 $\times$  coverage relative to the length of the targeted region. Reads with a mean qscore greater than 7 and a read length greater than 1 kb were kept for the following steps. Canu (v. 1.7.1) (52) was used for raw read correction with default parameters except for corOutCov = 2,000 and corMinCoverage = 0. Corrected reads were aligned to Chr19Y using BWA-MEM (4). The chimeric reads were filtered by Alvis (53). Soft-clipped reads were flagged using the biostar84452.jar script (<https://github.com/lindenb/jvarkit.git>). After these filtering steps, reads with a mapping quality of 60 were retained. The mapped BAM file was converted to FASTQ file and fed into Canu (v. 1.7.1) (52) to assemble the reads into contigs with default parameters except for corOutCoverage = 500 and corMinCoverage = 0. Contigs were aligned on Chr19Y for dot plot visualization by ggplot2 (54).

#### **6-5. Confirmation of the male-specific region in wild populations by diagnostic primers**

To obtain more data supporting the male-specific presence of this region in a wild population (n = 20 for each sex of each species), we designed the primers “TS\_chr14\_8812k\_0.4k\_F” and

“TS\_chr14\_8812k\_0.5k\_R,” which produce distinct amplicons from the male-specific region (352 bp) and its paralogous region on Chr14 (408 bp) (Table S15). PCRs were carried out in a total reaction volume of 15  $\mu$ l containing 0.3  $\mu$ l (10  $\mu$ M) of each primer, 1.5  $\mu$ l of 10X brilliant buffer (Mg<sup>2+</sup> plus), 1.2  $\mu$ l of 2.5 mM dNTP mixture, 0.15  $\mu$ l of Hot-Start Gene Taq (Nippon Gene), 10.55  $\mu$ l DW, and 1  $\mu$ l (25 to 30 ng/ $\mu$ l) of genomic DNA. The following thermal conditions were used: initial denaturation at 95°C for 2 min, followed by 30 cycles at 94°C for 30 s and 64°C for 30 s and a final one-cycle elongation step at 65°C for 30 s. The two amplicons were identified using the DNA-500 Kit on a MultiNA instrument (Shimadzu, Kyoto, Japan). The designed PCR primers were referred to as the diagnostic primers.

## **7. Genome assembly in a *T. snyderi* XY male**

### **7-1. Long- and linked-read sequencing**

The whole-genome sequence of an XY individual from Lake Hamana was obtained using PromethION (Nanopore Technologies) and MGI single-tube long-fragment reads (stLFRs, MGISEQ-2000RS) (Table S16 and S17). Genomic DNA was isolated as described above. To enhance recovery of DNA fragments longer than 10-kb, the Short Read Eliminator XS kit (Circulomics, Baltimore, MD, USA) was used. Library preparation and sequencing for both technologies were performed by GeneBay. As for PromethION sequencing, the raw signal intensity data were used for base calling using Guppy (v. 3.0.3). In total, ~9.09-Gb data of 890,724 (N50 = 25 kb) reads were generated. Low-quality reads (with a mean quality score less than 7) and the adapters were removed using fastp (51) and Porechop (v. 0.2.3) (<https://github.com/rrwick/Porechop>), respectively. The retained reads were corrected in Canu (v. 1.7.1) (52) with the following settings: minimum read length = 5,000; minimum overlap length = 1,200; and corMinCoverage = 0. This resulted in a total of 7.05-Gb corrected reads. As for stLFR sequencing, the MGIEasy stLFR Library Prep Kit was used to prepare co-barcoding DNA libraries (55). The libraries were sequenced using the MGISEQ-2000RS. In total, ~38-Gb (without barcodes 32.17 Gb) of paired-end sequences was generated. The stLFR reads were filtered using SOAPfilter (v. 2.2) (56) with a Phred score  $\leq 10$  to remove adapter sequences and low-quality reads containing more than 60% bases. The data were registered in the DDBJ SRA (Accession No. [DRA014181](https://www.ncbi.nlm.nih.gov/sra/DRA014181)).

### **7-2. Hybrid genome assembly**

We generated an initial genome assembly of *T. snyderi* using Canu (v. 1.7.1) (52) with Nanopore long reads. For consensus correction, Nanopore long reads were mapped to the unitig sequences by Minimap2 (26), and three rounds of corrections were performed using Racon (27) followed by one round of correction using medaka (v. 1.2.1) (<https://nanoporetech.github.io/medaka/>). To improve the

Nanopore assembly with stLFR data, we first transformed the stLFR data to pseudo- 10X Genomics reads using the stlfr2supernova pipeline ([https://github.com/BGIQingdao/stlfr2supernova\\_pipeline](https://github.com/BGIQingdao/stlfr2supernova_pipeline)). Then the Nanopore assembly was scaffolded with the transformed stLFR reads using ARKS (v. 1.0.6) with LINKS (v. 1.8.7) (57, 58), using default parameters. The resultant assembly was polished twice using POLCA (59) with the transformed stLFR data.

The gene functional annotation of the assembly and its completeness assessment were conducted as described for *T. niphobles*. For the identification of the male-specific region, the relative depth of coverage between males and females was analyzed using 24 individuals for each sex (three pools each of females and males, with each pool containing eight individuals) as described for *T. niphobles*. The characterization of the male-specific region was conducted as described for *T. niphobles*.

## 8. Genome assembly in a *T. vermicularis* XY male

We sequenced the genome of an XY individual from Ariake Sea using PacBio long reads (Table S18) and Illumina paired-end short reads (Sample ID: S9, Table S5). The genomic DNA was extracted as described for *T. niphobles*. DNA fragments shorter than 10-kb were removed using the Short Read Eliminator XS kit. Library preparation and sequencing for PacBio Sequel II were performed at Macrogen Corporation. In total, ~128.8-Gb data composed of 11,257,208 subreads (N50 = 15 kb) were generated from a single PacBio SMRT cell. The PacBio subreads were corrected by Canu (v. 1.7.1) with the following settings: minimum read length = 7,000; minimum overlap length = 1,200; and coreOutcoverage = 200. This resulted in ~67.17-Gb of corrected reads. The data were registered in the DDBJ SRA (Accession No. DRA014182). For Illumina paired-end short reads, library preparation and sequencing were performed using the NovaSeq 6000 platform of GeneBay. We also sequenced additional eight female and one male *T. vermicularis* from Ariake Sea using the NovaSeq 6000 platform following the aforementioned protocol. Information about the resequencing statistics is presented in Table S5. The data were registered in the DDBJ SRA (Accession No. DRA012878). The short reads were trimmed by removing adapters and low-quality reads as described above, except that the option MINLEN:140 was used. We generated an initial genome assembly of *T. vermicularis* from the error-corrected PacBio reads using Minimap2 and Miniasm as described for *T. niphobles*. Sequence annotation of the assembly and assessment of its completeness were conducted as described for *T. niphobles*. For identification of the male-specific region, the relative depth of coverage between males and females was analyzed using 7 males and 12 females as described for *T. niphobles*. Characterization of the male-specific region was conducted as described for *T. niphobles*.

## 9. Phylogenetic analysis of male-specific genes and their autosomal paralogs



To determine the phylogenetic relationships between the male-specific genes and their autosomal paralog(s), we further identified their orthologs in *T. rubripes* (FUGU5) by combining BLAST results and their syntenic relationships. We used *Torquigener hypselogeneion* as the outgroup. Since the genome assembly for this species was not available, we constructed a de novo draft genome by assembling the Illumina short reads, obtained for the species phylogenetic analysis (Table S4), using Platanus Assembler (v. 1.2.4) with default parameters (15). The orthologous sequences of each targeted gene from *Torquigener hypselogeneion* were identified by reciprocal BLAST search approaches using the male-specific genes, *Torquigener hypselogeneion* genome, and FUGU5 annotation database. When multiple contigs of *Torquigener hypselogeneion* showed high similarity between a target gene from FUGU5, these contigs were further assembled using a reference-guided contig assembly strategy using ragtag (60). Finally, multiple sequence alignment files were generated for each gene from all species using webPRANK (61). Phylogenetic relationships were inferred using RAxML (v. 8.0) (13) with the *GTRGAMMA* model and *--JC69* option. The reliability of the inferred tree was tested by 1,000 fast bootstrap replicates. We also created alternative trees that incorporated InDels into the phylogeny construction. The gaps in the multiple sequence alignment were treated as fifth states and subjected to RAxML (v. 8.0) (13) with the *MULTICAT* model and *GTR* substitution model with the *-V* option. Furthermore, the concatenated sequences of the *Gsdf* and *Ppef2* genes from the male-specific and autosomal paralogs were used to construct the phylogeny with and without incorporation of the InDels information. Phylogenetic relationships without InDels information were inferred using RAxML (v. 8.0) (13) with the *GTRGAMMA* model, and those that did incorporate InDels information were inferred as described above. Source data are provided in [SI \(Fasta2\\_genes\\_on\\_SDR\\_and\\_their\\_paralogs.txt\)](#).

## 10. Admixture analysis

10-1. Tree topology weighting by topology weighting by iterative sampling of sub-trees (TWISST):

We quantified the genealogical relationships throughout the genomes of five *Takifugu* species using TWISST (62). To this end, we used 16,343,174 SNP sites from five *Takifugu* species (*T. rubripes* (n=4), *T. niphobles* (n=5), *T. snyderi* (n=5), *T. vermicularis* (n=3), *T. poecilonotus* (n=1)) and one outgroup species (*Torquigener hypselogeneion* (n=1)). Whole-genome resequencing data for *T. rubripes* were previously obtained in our laboratory (DDBJ SRA; [DRA007464](#)) (10). Quality control of the raw resequencing reads, mapping of the reads onto FUGU5, and SNP calling were performed as described above (“Phylogenetic framework” section in the supplementary Information). Variant filtering was achieved using *vcffilter* from *vcflib* (63) with the following parameters “QUAL / AO > 20 & SAF > 0 & SAR > 0 & RPR > 1 & RPL > 1.” Variants residing in the gaps, repeats, and non-



oriented scaffolds in FUGU5 were subsequently eliminated. The genotype dataset was phased using the program Beagle ver. 4.0 (64) with default parameters. We performed a sliding window–based estimation of the local phylogenetic relationships using the phased genotype dataset. The `raxml_sliding_windows.py` script from the `genomics_general` package ([https://github.com/simonhmartin/genomics\\_general/tree/master/phylo](https://github.com/simonhmartin/genomics_general/tree/master/phylo)) was used to reconstruct the phylogenetic trees in windows of 2,000 polymorphic sites. The TWISST program was used to calculate the weighting of each local window.

#### 10-2. $D$ statistics and $f_i$ -ratio statistics

To aid the interpretation of the TWISST analysis, we investigated admixture and introgression across the genomes of *Takifugu* species using Patterson’s  $D$  statistics (65, 66),  $f_i$ -ratio statistics (67), and  $f$ -branch statistics (68). We added resequencing data of two *Takifugu* individuals (*T. chrysops* (n=1), *T. pardalis* (n=1)) to the data used in the TWISST analysis and obtained 17,543,194 SNP sites. The past gene flow in seven species was inferred from  $D$  statistics calculated utilizing the four-taxon test (((P1, P2), P3), outgroup). Ancestral alleles were designated as “A” and derived alleles as “B,” and the genome-wide  $D$  statistics were calculated using all trio combinations among the seven species with Dsuite v.0.2 r20 (69), guided by the species tree that was constructed by RAxML (Fig. 1A).

*Torquigener hypselogeneion* was used as the outgroup for all trio combinations. Gene flow among species was examined, and it was determined if  $D$  statistics were greater than those expected under the model without gene flow. Test results were interpreted as follows: in four-taxon tests, a significant positive  $D$  statistic indicated gene flow between P2 and P3. In the four-taxon pattern (((P1, P2), P3), outgroup), the positions of P1 and P2 for a species are arbitrary; thus, Dsuite always assigns them so that P2 and P3 share more derived alleles, and the values of the ABBA–BABA statistics are then limited to between 0 and 1. Block jackknife resampling was used for the blocks of 5,000 informative sites to evaluate significant deviations from zero in Patterson’s  $D$  statistics. Furthermore, we used  $f_i$ -ratio statistics to infer the mixing proportions of an admixture event. The results presented in this study are based on the “tree” output of the Dsuite function Dtrios, with each trio arranged according to the species tree based on the maximum-likelihood topology estimated by RAxML (Fig. 1A).

#### SI References

1. A. M. Bolger, M. Lohse, B. Usadel, Trimmomatic: a flexible trimmer for Illumina sequence data. *Bioinformatics* **30**, 2114–2120 (2014).
2. S. Hosoya, *et al.*, Random PCR-based genotyping by sequencing technology GRAS-Di (genotyping by random amplicon sequencing, direct) reveals genetic structure of mangrove

- fishes. *Mol. Ecol. Resour.* **19**, 1153–1163 (2019).
3. W. Kai, *et al.*, Integration of the genetic map and genome assembly of fugu facilitates insights into distinct features of genome evolution in teleosts and mammals. *Genome Biol. Evol.* **3**, 424–442 (2011).
  4. H. Li, R. Durbin, Fast and accurate short read alignment with Burrows-Wheeler transform. *Bioinformatics* **25**, 1754–1760 (2009).
  5. A. McKenna, *et al.*, The Genome Analysis Toolkit: a MapReduce framework for analyzing next-generation DNA sequencing data. *Genome Res.* **20**, 1297–1303 (2010).
  6. P. Danecek, *et al.*, The variant call format and VCFtools. *Bioinformatics* **27**, 2156–2158 (2011).
  7. K. W. Broman, H. Wu, S. Sen, G. A. Churchill, R/qtl: QTL mapping in experimental crosses. *Bioinformatics* **19**, 889–890 (2003).
  8. R. Ieda, *et al.*, Identification of the sex-determining locus in grass puffer ( *Takifugu niphobles* ) provides evidence for sex-chromosome turnover in a subset of *Takifugu* species. *PLoS ONE* **131**, e0190635 (2018).
  9. R. W. Doerge, G. A. Churchill, Permutation tests for multiple loci affecting a quantitative character. *Genetics* **142**, 285–294 (1996).
  10. M. Sato, *et al.*, A highly flexible and repeatable genotyping method for aquaculture studies based on target amplicon sequencing using next-generation sequencing technology. *Sci. Rep.* **9**, 6904 (2019).
  11. H. Li, *et al.*, The Sequence Alignment/Map format and SAMtools. *Bioinformatics* **25**, 2078–2079 (2009).
  12. E. Garrison, G. Marth, Haplotype-based variant detection from short-read sequencing. *arXiv [Preprint]* (2012). <https://arxiv.org/abs/1207.3907> (Accessed 20 July 2012).
  13. A. Stamatakis, RAxML version 8: a tool for phylogenetic analysis and post-analysis of large phylogenies. *Bioinformatics* **30**, 1312–1313 (2014).
  14. G. Marçais, C. Kingsford, A fast, lock-free approach for efficient parallel counting of occurrences of k-mers. *Bioinformatics* **27**, 764–770 (2011).
  15. R. Kajitani, *et al.*, Efficient de novo assembly of highly heterozygous genomes from whole-genome shotgun short reads. *Genome Res.* **24**, 1384–1395 (2014).
  16. C. Camacho, *et al.*, BLAST+: architecture and applications. *BMC Bioinformatics* **10**, 421 (2009).
  17. Z. Zhang, S. Schwartz, L. Wagner, W. Miller, A greedy algorithm for aligning DNA sequences. *Journal of Computational Biology* **7** (2000).
  18. T. A. Hall, BioEdit: a user-friendly biological sequence alignment editor and analysis program for Windows 95/98/NT. *Nucleic Acids Symposium Series* **41**, 95–98 (1999).
  19. C. Ye, Z. S. Ma, C. H. Cannon, M. Pop, D. W. Yu, Exploiting sparseness in de novo genome assembly. *BMC Bioinformatics* **13 Suppl 6**, S1 (2012).

20. C. Ye, C. M. Hill, S. Wu, J. Ruan, Z. S. Ma, DBG2OLC: Efficient Assembly of Large Genomes Using Long Erroneous Reads of the Third Generation Sequencing Technologies. *Sci. Rep.* **6**, 31900 (2016).
21. C. Ye, Z. S. Ma, Sparc: a sparsity-based consensus algorithm for long erroneous sequencing reads. *PeerJ* **4**, e2016 (2016).
22. M. J. Chaisson, G. Tesler, Mapping single molecule sequencing reads using basic local alignment with successive refinement (BLASR): application and theory. *BMC Bioinformatics* **13**, 238 (2012).
23. C.-S. Chin, *et al.*, Nonhybrid, finished microbial genome assemblies from long-read SMRT sequencing data. *Nat. Methods* **10**, 563–569 (2013).
24. B. J. Walker, *et al.*, Pilon: an integrated tool for comprehensive microbial variant detection and genome assembly improvement. *PLoS One* **9**, e112963 (2014).
25. H. Li, Minimap and miniasm: fast mapping and de novo assembly for noisy long sequences. *Bioinformatics* **32**, 2103–2110 (2016).
26. H. Li, Minimap2: pairwise alignment for nucleotide sequences. *Bioinformatics* **34**, 3094–3100 (2018).
27. R. Vaser, I. Sović, N. Nagarajan, M. Šikić, Fast and accurate de novo genome assembly from long uncorrected reads. *Genome Res.* **27**, 737–746 (2017).
28. M. Chakraborty, J. G. Baldwin-Brown, A. D. Long, J. J. Emerson, Contiguous and accurate de novo assembly of metazoan genomes with modest long read coverage. *Nucleic Acids Res.* **44**, e147 (2016).
29. M. Kadota, *et al.*, Multifaceted Hi-C benchmarking: what makes a difference in chromosome-scale genome scaffolding? *Gigascience* **9**, **giz158** (2020).
30. N. Servant, *et al.*, HiC-Pro: an optimized and flexible pipeline for Hi-C data processing. *Genome Biol.* **16**, 259 (2015).
31. N. C. Durand, *et al.*, Juicer Provides a One-Click System for Analyzing Loop-Resolution Hi-C Experiments. *Cell Syst* **3**, 95–98 (2016).
32. O. Dudchenko, *et al.*, De novo assembly of the *Aedes aegypti* genome using Hi-C yields chromosome-length scaffolds. *Science* **356**, 92–95 (2017).
33. B. L. Cantarel, *et al.*, MAKER: an easy-to-use annotation pipeline designed for emerging model organism genomes. *Genome Res.* **18**, 188–196 (2008).
34. I. Korf, Gene finding in novel genomes. *BMC Bioinformatics* **5**, 59 (2004).
35. M. Stanke, A. Tzvetkova, B. Morgenstern, AUGUSTUS at EGASP: using EST, protein and genomic alignments for improved gene prediction in the human genome. *Genome Biol.* **7 Suppl 1**, S11.1-8 (2006).
36. F. A. Simão, R. M. Waterhouse, P. Ioannidis, E. V. Kriventseva, E. M. Zdobnov, BUSCO: assessing genome assembly and annotation completeness with single-copy orthologs. *Bioinformatics* **31**, 3210–3212 (2015).

37. A. Smit, R. Hubley, *RepeatModeler open-1.0* (2008–2015). Seattle, USA: Institute for Systems Biology. Available from: <httpwww.repeatmasker.org>, Last Accessed May 1, 2018.
38. Z. Bao, S. R. Eddy, Automated de novo identification of repeat sequence families in sequenced genomes. *Genome Res.* **12**, 1269–1276 (2002).
39. A. L. Price, N. C. Jones, P. A. Pevzner, De novo identification of repeat families in large genomes. *Bioinformatics* **21 Suppl 1**, i351-8 (2005).
40. D. Ellinghaus, S. Kurtz, U. Willhoeft, LTRharvest, an efficient and flexible software for de novo detection of LTR retrotransposons. *BMC Bioinformatics* **9**, 18 (2008).
41. S. Steinbiss, U. Willhoeft, G. Gremme, S. Kurtz, Fine-grained annotation and classification of de novo predicted LTR retrotransposons. *Nucleic Acids Res.* **37**, 7002–7013 (2009).
42. Y. Han, S. R. Wessler, MITE-Hunter: a program for discovering miniature inverted-repeat transposable elements from genomic sequences. *Nucleic Acids Res.* **38**, e199 (2010).
43. G. Benson, Tandem repeats finder: a program to analyze DNA sequences. *Nucleic Acids Res.* **27**, 573–580 (1999).
44. W. Bao, K. K. Kojima, O. Kohany, Repbase Update, a database of repetitive elements in eukaryotic genomes. *Mob. DNA* **6**, 11 (2015).
45. O. Nishimura, Y. Hara, S. Kuraku, gVolante for standardizing completeness assessment of genome and transcriptome assemblies. *Bioinformatics* **33**, 3635–3637 (2017).
46. G. Marçais, *et al.*, MUMmer4: A fast and versatile genome alignment system. *PLoS Comput. Biol.* **14**, e1005944 (2018).
47. M. Krzywinski, *et al.*, Circos: an information aesthetic for comparative genomics. *Genome Res.* **19**, 1639–1645 (2009).
48. D. Kim, B. Langmead, S. L. Salzberg, HISAT: a fast spliced aligner with low memory requirements. *Nat. Methods* **12**, 357–360 (2015).
49. H. Thorvaldsdóttir, J. T. Robinson, J. P. Mesirov, Integrative Genomics Viewer (IGV): high-performance genomics data visualization and exploration. *Brief. Bioinform.* **14**, 178–192 (2013).
50. B. S. Pedersen, A. R. Quinlan, Mosdepth: quick coverage calculation for genomes and exomes. *Bioinformatics* **34**, 867–868 (2018).
51. S. Chen, Y. Zhou, Y. Chen, J. Gu, Fastp: An ultra-fast all-in-one FASTQ preprocessor in *Bioinformatics* **34**, i884-i890 (2018).
52. S. Koren, *et al.*, Canu: Scalable and accurate long-read assembly via adaptive  $\kappa$ -mer weighting and repeat separation. *Genome Res.* **27** 722-736 (2017).
53. S. Martin, R. M. Leggett, Alvis: a tool for contig and read ALignment VISualisation and chimera detection. *BMC Bioinformatics* **22**, 124 (2021).
54. H. Wickham, Ggplot2. *Wiley Interdiscip. Rev. Comput. Stat.* **3**, 180–185 (2011).

55. O. Wang, *et al.*, Efficient and unique cobarcoding of second-generation sequencing reads from long DNA molecules enabling cost-effective and accurate sequencing, haplotyping, and de novo assembly. *Genome Res.* **29**, 798–808 (2019).
56. R. Luo, *et al.*, SOAPdenovo2: An empirically improved memory-efficient short-read de novo assembler. *GigaScience* **1**, **18** (2012).
57. L. Coombe, *et al.*, ARKS: chromosome-scale scaffolding of human genome drafts with linked read kmers. *BMC Bioinformatics* **19**, 234 (2018).
58. R. L. Warren, *et al.*, LINKS: Scalable, alignment-free scaffolding of draft genomes with long reads. *Gigascience* **4**, 35 (2015).
59. A. V. Zimin, S. L. Salzberg, The genome polishing tool POLCA makes fast and accurate corrections in genome assemblies. *PLoS Comput. Biol.* **16**, e1007981 (2020).
60. M. Alonge, *et al.*, RaGOO: fast and accurate reference-guided scaffolding of draft genomes. *Genome Biol.* **20**, 224 (2019).
61. A. Löytynoja, N. Goldman, webPRANK: a phylogeny-aware multiple sequence aligner with interactive alignment browser. *BMC Bioinformatics* **11**, 579 (2010).
62. S. H. Martin, S. M. Van Belleghem, Exploring evolutionary relationships across the genome using topology weighting. *Genetics* **206**, 429–438 (2017).
63. E. Garrison, Z. N. Kronenberg, E. T. Dawson, B. S. Pedersen, P. Prins, Vcflib and tools for processing the VCF variant call format. *bioRxiv* [Preprint] (2021)  
<https://doi.org/10.1101/2021.05.21.445151> (Last Accessed by July 23 2021).
64. S. R. Browning, B. L. Browning, Rapid and accurate haplotype phasing and missing-data inference for whole-genome association studies by use of localized haplotype clustering. *Am. J. Hum. Genet.* **81**, 1084–1097 (2007).
65. R. E. Green, *et al.*, A draft sequence of the Neandertal genome. *Science* **328**, 710–722 (2010).
66. E. Y. Durand, N. Patterson, D. Reich, M. Slatkin, Testing for ancient admixture between closely related populations. *Mol. Biol. Evol.* **28**, 2239–2252 (2011).
67. N. Patterson, *et al.*, Ancient admixture in human history. *Genetics* **192**, 1065–1093 (2012).
68. M. Malinsky, *et al.*, Whole-genome sequences of Malawi cichlids reveal multiple radiations interconnected by gene flow. *Nat. Ecol. Evol.* **2**, 1940–1955 (2018).
69. M. Malinsky, M. Matschiner, H. Svardal, Dsuite - Fast D-statistics and related admixture evidence from VCF files. *Mol. Ecol. Resour.* **21**, 584–595 (2021).

| Species                          | Sampled location                        | The proportion of the G/C genotype at SNP7271 in <i>Amhr2</i> |                   | Total number of fish examined | P-value for association between the genotype and phenotypic sex | Method                   | Previously reported or this study.   |
|----------------------------------|-----------------------------------------|---------------------------------------------------------------|-------------------|-------------------------------|-----------------------------------------------------------------|--------------------------|--------------------------------------|
|                                  |                                         | Phenotypic male                                               | Phenotypic female |                               |                                                                 |                          |                                      |
| <i>Takifugu rubripes</i> *       | Ensyu Nada, Ise Bay, Japan              | 7/7                                                           | 0/8               | 15                            | 0.0001554                                                       | Direct sequencing        | Kamiya et al. (2012).                |
| <i>Takifugu pardalis</i>         | Lake Hamana and Atusmi Peninsula, Japan | 20/20                                                         | 0/8               | 28                            | 1.21315E-07                                                     | Direct sequencing        | This study and Kamiya et al. (2012). |
| <i>Takifugu poecilonotus</i>     | Lake Hamana, Japan                      | 7/7                                                           | 0/6               | 13                            | 0.000311491                                                     | Direct sequencing        | Kamiya et al. (2012).                |
| <i>Takifugu chrysops</i>         | Izu Peninsula, Japan                    | 4/4                                                           | 0/4               | 8                             | 0.00467773                                                      | Direct sequencing        | This study                           |
| <i>Takifugu stictonotus</i>      | Shimonoseki, Fukui, and Ofunato, Japan  | 16/16                                                         | 0/26              | 42                            | 9.13E-11                                                        | Direct sequencing        | This study                           |
| <i>Takifugu obscurus</i> **      | Aquaculture fish in Yamaguchi, Japan    | 1/1                                                           | 0/2               | 3                             | 0.333333                                                        | Direct sequencing        | This study                           |
| <i>Takifugu ocellatus</i>        | Aquarium fish                           | 10/10                                                         | 0/2               | 12                            | 0.000532006                                                     | Direct sequencing        | This study                           |
| <i>Takifugu xanthopterus</i> *** | Shimonoseki, Japan                      | 9/10                                                          | 1/25              | 35                            | 3.62E-07                                                        | Direct sequencing        | This study                           |
| <i>Takifugu porphyreus</i>       | Shimonoseki, Japan                      | 8/8                                                           | 0/8               | 16                            | 6.33425E-05                                                     | Direct sequencing        | This study                           |
| <i>Takifugu niphobles</i> ****   | Lake Hamana, Japan                      | 0/8<br>0/100                                                  | 0/7<br>0/100      | 15<br>200                     | 1<br>1                                                          | Direct sequencing<br>HRM | Ieda et al. (2018).                  |
| <i>Takifugu snyderi</i> *****    | Sagara, Atsumi and Hitachi, Japan       | 1/16                                                          | 0/12              | 29                            | 0.377822                                                        | Direct sequencing        | This study                           |
|                                  | Sagara, Japan                           | 0/50                                                          | 0/50              | 100                           | 1                                                               | HRM                      |                                      |
| <i>Takifugu vermicularis</i>     | Ariake Bay (Shimabara), Japan           | 0/4<br>0/50                                                   | 0/4<br>0/50       | 8<br>100                      | 1<br>1                                                          | Direct sequencing<br>HRM | This study                           |

Table S1. SNP genotype in *Amhr2* and phenotypic sex of *Takifugu* species

\*A significant association between the genotype and phenotype has been reported for other individuals in Kamiya et al. (2012).

\*\*A significant association between the genotype and phenotype in three genetically independent aquaculture populations has been reported in the following paper. A rapid and reliable method for identifying genetic sex in obscure pufferfish (*Takifugu obscurus*). *Aquaculture* (2020) 519:734749. doi: 10.1016/j.aquaculture.2019.734749

\*\*\*One males and one female showed the mismatch with the genotype at the SNP site in *Amhr2*.

\*\*\*\*A significant association between the genotype and phenotype has been reported for other individuals in Ieda et al. (2018).

\*\*\*\*\*One out of 15 male individuals has the G/C genotype at the SNP site in *Amhr2*.

Table S2A. The families used for linkage mapping in *T. snyderi*

| Family name | AKA         | Total number of fish | Phenotypic male | Phenotypic female | Type of genetic markers  |
|-------------|-------------|----------------------|-----------------|-------------------|--------------------------|
| Family A    | shousai1202 | 83                   | 40              | 43                | Microsatellites on Chr18 |
|             |             | 98                   | 53              | 45                | Genome-wide SNP markers  |
| Family B    | shousai1201 | 25                   | 13              | 12                | Microsatellites on Chr18 |
| Family C    | shousai1203 | 62                   | 27              | 35                | Microsatellites on Chr18 |

Three wild-caught males were mated with a wild-caught female.

Table S2B. The families used for linkage mapping in *T. vermicularis*

| Family name | AKA     | Total number of fish | Phenotypic male | Phenotypic female | Type of genetic markers     |
|-------------|---------|----------------------|-----------------|-------------------|-----------------------------|
| Family D    | nashi12 | 62                   | 31              | 31                | Genome-wide microsatellites |
| Family E    | nashi15 | 164                  | 81              | 83                | Microsatellites on Chr10    |

Two wild-caught parents were mated independently.

Table S3A. Numbers of fish showing concordance and discordance between phenotypic and genotypic sex among those used for genetic mapping in *T. snyderi*

| Family name | Phenotypic male              |                                | Phenotypic female            |                                | P-value for association between the markers and sex |
|-------------|------------------------------|--------------------------------|------------------------------|--------------------------------|-----------------------------------------------------|
|             | Expected male genotype (XY)* | Expected female genotype (XX)* | Expected male genotype (XY)* | Expected female genotype (XX)* |                                                     |
| Family A    | 40                           | 0                              | 0                            | 43                             | 1.86E-23                                            |
| Family B    | 13                           | 0                              | 0                            | 12                             | 1.92E-20                                            |
| Family C    | 27                           | 0                              | 1                            | 34                             | 1.00E-16                                            |

\* The expected male and female genotypes were determined based on the paternally inherited allele of markers (f1618 and f1659) near the distal end of LG18 (Chr18).

Table S3B. Numbers of fish showing concordance and discordance between phenotypic and genotypic sex among those used for genetic mapping in *T. vermicularis*

| Family name | Phenotypic male              |                                | Phenotypic female            |                                | P-value for association between the markers and sex |
|-------------|------------------------------|--------------------------------|------------------------------|--------------------------------|-----------------------------------------------------|
|             | Expected male genotype (XY)* | Expected female genotype (XX)* | Expected male genotype (XY)* | Expected female genotype (XX)* |                                                     |
| Family D    | 31                           | 0                              | 0                            | 31                             | 4.29E-15                                            |
| Family E    | 80                           | 1                              | 5                            | 78                             | 1.80E-39                                            |

\* The expected male and female genotypes were determined based on the paternally inherited allele of markers sca541-1 near the distal end of LG10 (Chr10).



Table S4. Sample information and genome resequencing statistics of *Takifugu* species for the phylogenetic analysis

| Species                           | AKA               | Platform    | Paired-end (bp) | Reads Number | Base (Mb) | Coverage (x) |
|-----------------------------------|-------------------|-------------|-----------------|--------------|-----------|--------------|
| <i>Takifugu rubripes</i>          | UT01              | HiSeq 2000  | 100x2           | 45,150,676   | 4,515     | 11.3         |
| <i>Takifugu pardalis</i>          | higanfugu         | HiSeq 2500  | 90x2            | 142,361,704  | 12,812    | 32.0         |
| <i>Takifugu poecilonotus</i>      | komonfugu         | HiSeq 2000  | 100x2           | 49,668,804   | 4,967     | 12.4         |
| <i>Takifugu chrysops</i>          | Aka_1             | HiSeq X Ten | 150x2           | 122,637,398  | 18,395    | 46.0         |
| <i>Takifugu stictonotus</i>       | Gomafugu          | HiSeq 2500  | 90x2            | 139,026,904  | 12,512    | 31.3         |
| <i>Takifugu obscurus</i>          | mefugu            | HiSeq 2000  | 100x2           | 46,304,194   | 4,630     | 11.6         |
| <i>Takifugu ocellatus</i>         | meganefugu        | HiSeq 2000  | 100x2           | 55,867,410   | 5,587     | 14.0         |
| <i>Takifugu xanthopterus</i>      | shimafugu         | HiSeq 2000  | 100x2           | 41,690,572   | 4,169     | 10.4         |
| <i>Takifugu porphyreus</i>        | mafugu            | HiSeq 2500  | 90x2            | 144,594,610  | 13,013    | 32.5         |
| <i>Takifugu niphobles</i>         | kusafugu11_male32 | HiSeq 2500  | 90x2            | 149,777,588  | 13,478    | 33.7         |
| <i>Takifugu snyderi</i>           | TS_ATM_no_13      | HiSeq 2500  | 150x2           | 28,346,608   | 4,251     | 10.6         |
| <i>Takifugu vermicularis</i>      | nashifugu         | HiSeq 2000  | 100x2           | 48,787,416   | 4,879     | 12.2         |
| <i>Torquigener hypselogeneion</i> | namidafugu        | HiSeq 2000  | 100x2           | 46,268,560   | 4,627     | 11.6         |

Table S5A. Sample information and genome resequencing statistics of *Takifugu niphobles*

| Sample ID | AKA                    | Sex | Platform   | Paired-end (bp) | Reads Number | Base (Mb) | Coverage (x) | Sampling location | The analysis used for                 |
|-----------|------------------------|-----|------------|-----------------|--------------|-----------|--------------|-------------------|---------------------------------------|
| 12m       | TN_2010_no_12_male     | M   | Hiseq 2000 | 150x2           | 28,501,980   | 4,275     | 10.7         | Lake Hamana       | k-mer, coverage, k-mer based assembly |
| 19m       | TN_2010_no_19_male     | M   | Hiseq 2000 | 150x2           | 28,497,398   | 4,274     | 10.7         | Lake Hamana       | k-mer, coverage, k-mer based assembly |
| 10m       | TN_2010_no_10_male     | M   | Hiseq 2000 | 150x2           | 28,508,256   | 4,276     | 10.7         | Lake Hamana       | k-mer, coverage, k-mer based assembly |
| 11m       | TN_2010_no_11_male     | M   | Hiseq 2000 | 150x2           | 28,512,916   | 4,276     | 10.7         | Lake Hamana       | k-mer, coverage, k-mer based assembly |
| m8        | kusafugu male 1        | M   | Hiseq 2000 | 90x2            | 140,463,248  | 12,641    | 31.6         | Lake Hamana       | coverage                              |
| m1        | kusafugu09_male1       | M   | Hiseq 2000 | 90x2            | 148,625,678  | 13,374    | 33.4         | Lake Hamana       | coverage                              |
| m30       | kusafugu11_male30      | M   | Hiseq 2000 | 90x2            | 149,786,688  | 13,479    | 33.7         | Lake Hamana       | coverage                              |
| m31       | kusafugu11_male31      | M   | Hiseq 2000 | 90x2            | 149,062,258  | 13,410    | 33.5         | Lake Hamana       | coverage                              |
| m32       | kusafugu11_male32      | M   | Hiseq 2000 | 90x2            | 149,777,588  | 13,478    | 33.7         | Lake Hamana       | coverage                              |
| 0525m     | TN_20150525_male       | M   | Hiseq 2000 | 150x2           | 28,330,108   | 4,249     | 10.6         | Lake Hamana       | k-mer, coverage, k-mer based assembly |
| Bfe       | TN_2015B_female        | F   | Hiseq 2000 | 150x2           | 28,404,224   | 4,260     | 10.7         | Lake Hamana       | k-mer, coverage                       |
| Afe       | TN_2015A_female        | F   | Hiseq 2000 | 150x2           | 28,375,024   | 4,256     | 10.6         | Lake Hamana       | k-mer, coverage                       |
| 65fe      | TN_2010_no_65_female   | F   | Hiseq 2000 | 150x2           | 28,396,346   | 4,259     | 10.6         | Lake Hamana       | k-mer, coverage                       |
| 44fe      | TN_2010_no_44_female   | F   | Hiseq 2000 | 150x2           | 28,493,116   | 4,273     | 10.7         | Lake Hamana       | k-mer, coverage                       |
| 35fe      | TN_yyno_35_xxfemale    | F   | Hiseq 2000 | 150x2           | 28,282,010   | 4,242     | 10.6         | Lake Hamana       | coverage                              |
| Misakife  | TN_2012Misaki_xxfemale | F   | Hiseq 2000 | 150x2           | 28,197,746   | 4,229     | 10.6         | Lake Hamana       | k-mer, coverage                       |
| 41fe      | TN_2010_no_41_female   | F   | Hiseq 2000 | 150x2           | 28,353,496   | 4,253     | 10.6         | Lake Hamana       | coverage                              |
| 1103fe    | TN_1103_xxfemale       | F   | Hiseq 2000 | 150x2           | 28,356,500   | 4,253     | 10.6         | Lake Hamana       | k-mer, coverage                       |

Table S5B. Sample information and genome resequencing statistics of *Takifugu snyderi*

| Sample ID | The pooled number of individuals | Sex | Platform    | Paired-end (bp) | Reads Number | Base (Mb) | Coverage (x) | Sampling location | The analysis used for |
|-----------|----------------------------------|-----|-------------|-----------------|--------------|-----------|--------------|-------------------|-----------------------|
| fP1       | 8                                | F   | HiSeq X Ten | 150x2           | 455,991,960  | 68,855    | 21.5         | Sagara            | k-mer, coverage       |
| fP2       | 8                                | F   | HiSeq X Ten | 150x2           | 471,561,858  | 71,206    | 22.3         | Sagara            | k-mer, coverage       |
| fP3       | 8                                | F   | HiSeq X Ten | 150x2           | 467,422,088  | 70,581    | 22.1         | Sagara            | k-mer, coverage       |
| mP1       | 8                                | M   | HiSeq X Ten | 150x2           | 477,727,398  | 72,137    | 22.5         | Sagara            | k-mer, coverage       |
| mP2       | 8                                | M   | HiSeq X Ten | 150x2           | 455,008,940  | 68,706    | 21.5         | Sagara            | k-mer, coverage       |
| mP3       | 8                                | M   | HiSeq X Ten | 150x2           | 472,824,138  | 71,396    | 22.3         | Sagara            | k-mer, coverage       |

Table S5C. Sample information and genome resequencing statistics of *Takifugu vermicularis*

| Sample ID | AKA | Sex | Platform     | Paired-end (bp) | Reads Number | Base (Mb) | Coverage (x) | Sampling location | The analysis used for                                     |
|-----------|-----|-----|--------------|-----------------|--------------|-----------|--------------|-------------------|-----------------------------------------------------------|
| 89        | NA  | F   | HiSeq 2500   | 150x2           | 28,151,646   | 4,223     | 10.6         | Ariake Sea        | k-mer, coverage                                           |
| 90        | NA  | F   | HiSeq 2500   | 150x2           | 28,427,218   | 4,264     | 10.7         | Ariake Sea        | k-mer, coverage                                           |
| 92        | NA  | F   | HiSeq 2500   | 150x2           | 28,334,946   | 4,250     | 10.6         | Ariake Sea        | k-mer, coverage                                           |
| 93        | NA  | F   | HiSeq 2500   | 150x2           | 28,375,900   | 4,256     | 10.6         | Ariake Sea        | k-mer, coverage                                           |
| 94        | NA  | M   | HiSeq 2500   | 150x2           | 28,326,008   | 4,249     | 10.6         | Ariake Sea        | k-mer, coverage                                           |
| 95        | NA  | M   | HiSeq 2500   | 150x2           | 28,333,434   | 4,250     | 10.6         | Ariake Sea        | k-mer, coverage                                           |
| 96        | NA  | M   | HiSeq 2500   | 150x2           | 28,416,252   | 4,262     | 10.7         | Ariake Sea        | k-mer, coverage                                           |
| 97        | NA  | M   | HiSeq 2500   | 150x2           | 28,430,436   | 4,265     | 10.7         | Ariake Sea        | k-mer, coverage                                           |
| 1         | NA  | M   | HiSeq 2500   | 100x2           | 48,787,416   | 4,878     | 12.2         | Ariake Sea        | coverage                                                  |
| S9        | NA  | M   | NovaSeq 6000 | 150x2           | 60,399,446   | 9,059     | 22.6         | Ariake Sea        | coverage, assembly construction with long and short reads |
| S11       | NA  | M   | NovaSeq 6000 | 150x2           | 64,961,632   | 9,744     | 24.4         | Ariake Sea        | coverage                                                  |
| S1        | NA  | F   | NovaSeq 6000 | 150x2           | 67,223,726   | 10,083    | 25.2         | Ariake Sea        | coverage                                                  |
| S3        | NA  | F   | NovaSeq 6000 | 150x2           | 62,019,898   | 9,302     | 23.3         | Ariake Sea        | coverage                                                  |
| S4        | NA  | F   | NovaSeq 6000 | 150x2           | 67,825,690   | 10,173    | 25.4         | Ariake Sea        | coverage                                                  |
| S7        | NA  | F   | NovaSeq 6000 | 150x2           | 60,123,744   | 9,018     | 22.5         | Ariake Sea        | coverage                                                  |
| S2        | NA  | F   | NovaSeq 6000 | 150x2           | 72,475,682   | 10,871    | 27.2         | Ariake Sea        | coverage                                                  |
| S5        | NA  | F   | NovaSeq 6000 | 150x2           | 70,944,158   | 10,641    | 26.6         | Ariake Sea        | coverage                                                  |
| S6        | NA  | F   | NovaSeq 6000 | 150x2           | 64,852,998   | 9,727     | 24.3         | Ariake Sea        | coverage                                                  |
| S10       | NA  | F   | NovaSeq 6000 | 150x2           | 60,425,356   | 9,063     | 22.7         | Ariake Sea        | coverage                                                  |

Table S6A. Assembly statistics of the male-specific contigs of *T. niphobles*, *T. snyderi*, and *T. vermicularis* obtained from 35-mer analysis

|                         | <i>T. niphobles</i> | <i>T. snyderi</i> | <i>T. vermicularis</i> |
|-------------------------|---------------------|-------------------|------------------------|
| Total length            | 218,693 bp          | 490,306 bp        | 712,486 bp             |
| Total number of contigs | 551                 | 1,499             | 2,267                  |
| Longest contig          | 3,867 bp            | 2,354 bp          | 1,637 bp               |
| N50 contigs size        | 361 bp              | 302 bp            | 291 bp                 |
| Shortest contig         | 203 bp              | 128 bp            | 131 bp                 |
| Average contig size     | 397 bp              | 327 bp            | 314 bp                 |

Table S6B. Assembly statistics of the repeat masking male-specific contigs of *T. niphobles*, *T. snyderi*, and *T. vermicularis* obtained from 35-mer analysis

|                         | <i>T. niphobles</i> | <i>T. snyderi</i> | <i>T. vermicularis</i> |
|-------------------------|---------------------|-------------------|------------------------|
| Total length            | 189,350 bp          | 412,993 bp        | 636,715 bp             |
| Total number of contigs | 504                 | 1,321             | 2,143                  |
| Longest contig          | 3,395 bp            | 2,054 bp          | 1,637 bp               |
| N50 contigs size        | 352 bp              | 292 bp            | 283 bp                 |
| Shortest contig         | 103 bp              | 102 bp            | 101 bp                 |
| Average contig size     | 376 bp              | 313 bp            | 297 bp                 |

Table S7. Protein-coding genes in the repeat masking male-specific contigs of *T. niphobles*, *T. snyderi*, and *T. vermicularis* identified by the 35-mer analysis

| <i>T. niphobles</i>  |                                  |            |            |                     |
|----------------------|----------------------------------|------------|------------|---------------------|
| Transcript           | Chromosome                       | Start      | End        | Gene name           |
| ENSTRUT00000050560.1 | Chr6                             | 3,843,340  | 3,848,045  | <i>Gsdf</i>         |
| ENSTRUT00000036284.2 | Chr6                             | 3,847,801  | 3,854,105  | <i>Ppef2</i>        |
| ENSTRUT00000036506.2 | Chr6                             | 3,855,437  | 3,860,495  | <i>Nup54</i>        |
| ENSTRUT00000047035.2 | Chr6                             | 4,322,729  | 4,325,103  | <i>Phyhd1</i>       |
| ENSTRUT00000026952.2 | Chr12                            | 2,412,069  | 2,413,877  | <i>Uqcrb</i>        |
| ENSTRUT00000004332.2 | HE591965<br>(linked to<br>Chr17) | 5,569      | 11,125     | <i>Cbx4</i>         |
|                      | Chr22                            | 10,421,960 | 10,423,745 | <i>LOC105418166</i> |
|                      |                                  |            |            |                     |
| ENSTRUT00000000264.2 | HE592879                         | 5,023      | 6,581      |                     |
| ENSTRUT00000049960.1 | HE592881                         | 4,321      | 5,864      |                     |
| ENSTRUT00000050972.1 | HE593486                         | 4,284      | 5,854      |                     |
| ENSTRUT00000033706.2 | HE593884                         | 6,668      | 7,747      |                     |
| ENSTRUT00000008519.2 | HE594729                         | 398        | 1,566      |                     |
| ENSTRUT00000006976.2 | HE595883                         | 381        | 2,179      |                     |

| <i>T. snyderi</i>    |                                  |            |            |                     |
|----------------------|----------------------------------|------------|------------|---------------------|
| Transcript           | Chromosome                       | Start      | End        | Gene name           |
| ENSTRUT00000050560.1 | Chr6                             | 3,843,340  | 3,848,045  | <i>Gsdf</i>         |
| ENSTRUT00000036284.2 | Chr6                             | 3,847,801  | 3,854,105  | <i>Ppef2</i>        |
| ENSTRUT00000047035.2 | Chr6                             | 4,322,729  | 4,325,103  | <i>Phyhd1</i>       |
| ENSTRUT00000049362.1 | Chr13                            | 249,922    | 251,189    |                     |
| ENSTRUT00000004696.2 | Chr19                            | 5,543,117  | 5,547,028  |                     |
| ENSTRUT00000028499.2 | Chr20                            | 590,965    | 593,234    |                     |
| ENSTRUT00000053310.1 | Chr21                            | 3,903,120  | 3,907,840  |                     |
|                      | Chr22                            | 10,421,960 | 10,423,745 | <i>LOC105418166</i> |
| ENSTRUT00000051340.1 | HE591759                         | 67,310     | 68,298     |                     |
| ENSTRUT00000053632.1 | HE591843                         | 283,793    | 285,052    |                     |
| ENSTRUT00000006207.2 | HE591877                         | 1,747      | 10,877     |                     |
|                      | HE591965<br>(linked to<br>Chr17) | 5,569      | 11,125     | <i>Cbx4</i>         |
| ENSTRUT00000005695.2 | HE592014                         | 11,953     | 13,339     |                     |
| ENSTRUT00000054941.1 | HE592045                         | 34,942     | 37,166     |                     |
| ENSTRUT00000002195.2 | HE592247                         | 840        | 5,029      |                     |
| ENSTRUT00000003378.2 | HE592566                         | 13,102     | 16,210     |                     |
| ENSTRUT00000057277.1 | HE592566                         | 4,546      | 6,019      |                     |
| ENSTRUT00000005528.2 | HE592608                         | 521        | 8,296      |                     |
| ENSTRUT00000005165.2 | HE592831                         | 6,766      | 8,194      |                     |
| ENSTRUT00000000264.2 | HE592879                         | 5,023      | 6,581      |                     |

|                      |          |        |        |
|----------------------|----------|--------|--------|
| ENSTRUT0000001494.2  | HE592881 | 9,873  | 10,567 |
| ENSTRUT00000049960.1 | HE592881 | 4,321  | 5,864  |
| ENSTRUT00000049117.1 | HE592908 | 8,974  | 10,242 |
| ENSTRUT00000049458.1 | HE592972 | 44     | 4,148  |
| ENSTRUT00000052718.1 | HE593008 | 11,482 | 12,178 |
| ENSTRUT00000052794.1 | HE593106 | 21     | 1,160  |
| ENSTRUT00000034896.2 | HE593292 | 1,595  | 8,108  |
| ENSTRUT00000049469.1 | HE593327 | 8,328  | 10,161 |
| ENSTRUT0000007069.2  | HE593424 | 4,501  | 5,859  |
| ENSTRUT00000051117.1 | HE593431 | 1,054  | 2,443  |
| ENSTRUT00000050972.1 | HE593486 | 4,284  | 5,854  |
| ENSTRUT00000055318.1 | HE593539 | 4,414  | 5,937  |
| ENSTRUT0000005027.2  | HE593607 | 3,122  | 7,140  |
| ENSTRUT00000055210.1 | HE593740 | 1,027  | 2,672  |
| ENSTRUT00000033706.2 | HE593884 | 6,668  | 7,747  |
| ENSTRUT00000051955.1 | HE594621 | 26     | 2,549  |
| ENSTRUT00000012543.2 | HE594752 | 1,424  | 4,265  |
| ENSTRUT00000035679.2 | HE594850 | 4,400  | 6,263  |
| ENSTRUT00000055929.1 | HE595010 | 5,440  | 6,442  |
| ENSTRUT00000050001.1 | HE595161 | 25     | 2,037  |
| ENSTRUT00000006228.2 | HE596788 | 947    | 2,433  |
| ENSTRUT00000054060.1 | HE597519 | 370    | 2,307  |
| ENSTRUT00000054619.1 | HE598190 | 1,342  | 2,148  |

---

*T. vermicularis*

---

| Transcript           | chromosome                       | start      | end        | gene name            |
|----------------------|----------------------------------|------------|------------|----------------------|
| ENSTRUT0000003077.2  | Chr4                             | 5,033,623  | 5,038,911  | <i>Cyp3A27</i>       |
| ENSTRUT00000050560.1 | Chr6                             | 3,843,340  | 3,848,045  | <i>Gsdf</i>          |
| ENSTRUT00000036284.2 | Chr6                             | 3,847,801  | 3,854,105  | <i>Ppef2</i>         |
| ENSTRUT00000000482.2 | Chr7                             | 5,879,689  | 5,880,456  | <i>Hepcidin-like</i> |
| ENSTRUT00000057327.1 | Chr7                             | 6,637,502  | 6,643,374  |                      |
|                      | Chr22                            | 10,421,960 | 10,423,745 | <i>LOC105418166</i>  |
|                      | HE591965<br>(linked to<br>Chr17) | 5,569      | 11,125     | <i>Cbx4</i>          |
| ENSTRUT0000004332.2  | HE593539                         | 4,414      | 5,937      |                      |
| ENSTRUT00000055318.1 | HE593539                         | 4,414      | 5,937      |                      |
| ENSTRUT00000033706.2 | HE593884                         | 6,668      | 7,747      |                      |
| ENSTRUT00000006319.2 | HE597518                         | 1,831      | 2,746      |                      |

---

Table S8. Summary of PacBio long read (Sequel) (141.5× coverage) for a male of *T. niphobles*

|                                    |                |
|------------------------------------|----------------|
| Number of SMRT cell                | 7              |
| Number of Subread                  | 5,445,262      |
| Total Bases of Subread (bp)        | 56,602,699,569 |
| Mean read length of Subread (bp)   | 10,395         |
| Median read length of Subread (bp) | 7,699          |
| Subread N50 (bp)                   | 17,204         |

Table S9. Summary of Illumina paired-end short-read (57.6× coverage) for a male of *T. niphobles*

| Read length | Reads    | Base (bp)   | Platform   | Coverage |
|-------------|----------|-------------|------------|----------|
| 245x2       | 92567888 | 22679132560 | HiSeq 2500 | 56.7     |

Table S10. Post-sequencing quality control of the Hi-C library

| Read-pair category               | Liver-DpnII library |
|----------------------------------|---------------------|
| <b>Genome mapping</b>            |                     |
| Unique mapped                    | 62.9%               |
| Unmapped                         | 1.6%                |
| Multiple mapped                  | 21.2%               |
| Singleton mapped                 | 14.3%               |
| <b>Structure of Hi-C library</b> |                     |
| Valid interaction                | 60.6%               |
| Dangling-end                     | 0.9%                |
| Religation                       | 1.3%                |
| Self circle                      | 0.1%                |
| Single-end                       | 0.0%                |
| Filtered                         | 0.0%                |
| Dumped                           | 0.0%                |



Table S11. Pseudochromosomes in *T. niphobles* assembly

| Pseudochromosome | length (bp) |
|------------------|-------------|
| chromosome_1     | 29,787,861  |
| chromosome_2     | 14,645,703  |
| chromosome_3     | 17,155,000  |
| chromosome_4     | 16,156,946  |
| chromosome_5     | 13,743,954  |
| chromosome_6     | 12,714,000  |
| chromosome_7     | 16,596,000  |
| chromosome_8     | 19,988,554  |
| chromosome_9     | 15,883,851  |
| chromosome_10    | 13,966,000  |
| chromosome_11    | 16,244,946  |
| chromosome_12    | 13,266,446  |
| chromosome_13    | 20,217,573  |
| chromosome_14    | 16,184,500  |
| chromosome_15    | 15,720,327  |
| chromosome_16    | 13,444,393  |
| chromosome_17    | 16,811,000  |
| chromosome_18    | 10,770,500  |
| chromosome_19    | 17,051,500  |
| chromosome_20    | 17,331,000  |
| chromosome_21    | 18,322,500  |
| chromosome_22    | 15,772,500  |

Table S12. Summary of the complete, fragmented, missing, and duplicated orthologs inferred from Benchmarking Universal Single-Copy Orthologs (BUSCO) search against the 4,584 highly conserved orthologs for Actinopterygii

| BUSCO statistic   | YY <i>T. niphobles</i> | XY <i>T. snyderi</i> | XY <i>T. vermicularis</i> |
|-------------------|------------------------|----------------------|---------------------------|
| Complete BUSCOs   | 4,326 (94.4%)          | 4,440 (96.86%)       | 4,426 (96.6%)             |
| Fragmented BUSCOs | 152 (3.3%)             | 77 (1.7%)            | 64 (1.4%)                 |
| Missing BUSCOs    | 106 (2.3%)             | 66 (1.44%)           | 94 (2.1%)                 |
| Duplicated BUSCOs | 143 (3.1%)             | 110 (2.41%)          | 213 (4.7%)                |

Table S13A. Repeat annotation of the 130-kb male-specific region (2.828 Mb to 2.957 Mb on Chr19Y)

| Total length: 129,662 bp                                     |                    |                 |                            |
|--------------------------------------------------------------|--------------------|-----------------|----------------------------|
| GC level: 45.68%                                             |                    |                 |                            |
| Total length of the repeat rich regions: 55,121 bp ( 42.51%) |                    |                 |                            |
| Elements                                                     | number of elements | length occupied | percentage of sequence (%) |
| SINEs:                                                       | 0                  | 0               | 0                          |
| ALUs                                                         | 0                  | 0               | 0                          |
| MIRs                                                         | 0                  | 0               | 0                          |
| LINEs:                                                       | 10                 | 5,272           | 4.07                       |
| LINE1                                                        | 0                  | 0               | 0                          |
| LINE2                                                        | 0                  | 0               | 0                          |
| L3/CR1                                                       | 0                  | 0               | 0                          |
| LTR elements:                                                | 27                 | 22,173          | 0                          |
| ERVL                                                         | 0                  | 0               | 0                          |
| ERVL-MaLRs                                                   | 0                  | 0               | 0                          |
| ERV_classI                                                   | 6                  | 828             | 6.39                       |
| ERV_classII                                                  | 0                  | 0               | 0                          |
| DNA elements:                                                | 13                 | 4,853           | 3.74                       |
| hAT-Charlie                                                  | 2                  | 438             | 0.34                       |
| TcMar-Tigger                                                 | 0                  | 0               | 0                          |
| Unclassified:                                                | 28                 | 20,642          | 0                          |
| Total interspersed repeats:                                  |                    | 52,940          | 0                          |
| Small RNA:                                                   | 0                  | 0               | 0                          |
| Satellites:                                                  | 0                  | 0               | 0                          |
| Simple repeats:                                              | 27                 | 2,706           | 2.09                       |
| Low complexity:                                              | 2                  | 91              | 0.07                       |

Table S13B. Repeat annotation of the 115-kb male-specific region (2.970 Mb to 3.085 Mb on Chr19Y)

| Elements                                                     | number of elements | length occupied | percentage of sequence (%) |
|--------------------------------------------------------------|--------------------|-----------------|----------------------------|
| Total length: 115,000 bp                                     |                    |                 |                            |
| GC level: 44.85%                                             |                    |                 |                            |
| Total length of the repeat rich regions: 71,663 bp ( 62.32%) |                    |                 |                            |
| SINEs:                                                       | 1                  | 209             | 0.18                       |
| ALUs                                                         | 0                  | 0               | 0.00                       |
| MIRs                                                         | 0                  | 0               | 0.00                       |
| LINEs:                                                       | 24                 | 14,898          | 12.95                      |
| LINE1                                                        | 0                  | 0               | 0.00                       |
| LINE2                                                        | 13                 | 6,972           | 6.06                       |
| L3/CR1                                                       | 0                  | 0               | 0.00                       |
| LTR elements:                                                | 7                  | 4,967           | 4.32                       |
| ERVL                                                         | 0                  | 0               | 0.00                       |
| ERVL-MaLRs                                                   | 0                  | 0               | 0.00                       |
| ERV_classI                                                   | 3                  | 3,226           | 2.81                       |
| ERV_classII                                                  | 0                  | 0               | 0.00                       |
| DNA elements:                                                | 53                 | 23,145          | 20.13                      |
| hAT-Charlie                                                  | 8                  | 2,471           | 2.15                       |
| TcMar-Tigger                                                 | 0                  | 0               | 0.00                       |
| Unclassified:                                                | 47                 | 26,181          | 22.77                      |
| Total interspersed repeats:                                  |                    | 69,400          | 60.35                      |
| Small RNA:                                                   | 0                  | 0               | 0.00                       |
| Satellites:                                                  | 0                  | 0               | 0.00                       |
| Simple repeats:                                              | 20                 | 2,130           | 1.85                       |
| Low complexity:                                              | 2                  | 133             | 0.12                       |

Table S13C. Repeat annotation for the genome assembly of *T. niphobles*

| Total length of the assembly: 396,489,440 bp                    |                    |                      |                         |
|-----------------------------------------------------------------|--------------------|----------------------|-------------------------|
| GC level: 45.65%                                                |                    |                      |                         |
| Total length of the repeat rich regions: 63,245,816 bp (15.95%) |                    |                      |                         |
| Elements                                                        | number of elements | length occupied (bp) | Percent of sequence (%) |
| SINEs:                                                          | 4,588              | 794,469              | 0.2                     |
| ALUs                                                            | 0                  | 0                    | 0                       |
| MIRs                                                            | 103                | 10,054               | 0                       |
| LINEs:                                                          | 27,519             | 15,149,565           | 3.82                    |
| LINE1                                                           | 112                | 107,478              | 0.03                    |
| LINE2                                                           | 14,394             | 7,302,237            | 1.84                    |
| L3/CR1                                                          | 0                  | 0                    | 0                       |
| LTR elements:                                                   | 8,406              | 5,020,062            | 1.27                    |
| ERVL                                                            | 0                  | 0                    | 0                       |
| ERVL-MaLRs                                                      | 0                  | 0                    | 0                       |
| ERV_classI                                                      | 1,156              | 1,016,554            | 0.26                    |
| ERV_classII                                                     | 0                  | 0                    | 0                       |
| DNA elements:                                                   | 31,531             | 13,122,993           | 3.31                    |
| hAT-Charlie                                                     | 5,361              | 2,541,555            | 0.64                    |
| TcMar-Tigger                                                    | 1,169              | 427,845              | 0.11                    |
| Unclassified:                                                   | 35,632             | 17,042,877           | 4.3                     |
| Total interspersed repeats:                                     |                    | 51,129,966           | 12.9                    |
| Small RNA:                                                      | 40                 | 6,366                | 0                       |
| Satellites:                                                     | 330                | 184,413              | 0.05                    |
| Simple repeats:                                                 | 173,261            | 10,993,224           | 2.77                    |
| Low complexity:                                                 | 13,391             | 960,562              | 0.24                    |

Table S14. Summary of *T. niphobles* RNA sequence data

| Sample ID  | Sex    | Raw reads  | Clean reads | Raw base (Gb) | Clean base (Gb) | Mapping percentage (%) | Platform   | Read length |
|------------|--------|------------|-------------|---------------|-----------------|------------------------|------------|-------------|
| KK_XX_a_19 | female | 18,833,080 | 18,586,998  | 5.65          | 5.58            | 78.4                   | HiSeq 2000 | 150x2       |
| KK_XX_a_20 | female | 13,329,149 | 13,135,808  | 4             | 3.94            | 78.94                  | HiSeq 2000 | 150x2       |
| KK_XX_a_21 | female | 13,088,469 | 12,839,537  | 3.93          | 3.85            | 81.06                  | HiSeq 2000 | 150x2       |
| KK_XY_a_22 | male   | 15,587,826 | 15,262,247  | 4.68          | 4.58            | 82.69                  | HiSeq 2000 | 150x2       |
| KK_XY_a_23 | male   | 20,181,900 | 19,801,853  | 6.05          | 5.94            | 81.81                  | HiSeq 2000 | 150x2       |
| KK_XY_a_24 | male   | 14,065,137 | 13,726,104  | 4.22          | 4.12            | 77.86                  | HiSeq 2000 | 150x2       |

Table S15A. Primers for the tiling PCR targeting the male-specific and adjacent regions in *T. niphobles* (long-range)

| Long-range     |                            |                |                            |                      |                        |
|----------------|----------------------------|----------------|----------------------------|----------------------|------------------------|
| Forward primer | Sequence                   | Reverse primer | Sequence                   | Amplicon length (bp) | location               |
| Sd-20f         | GGTTCCAATCCAGACTCAGCA      | sd-s-5r        | TCGACTGTGTTGGGCCTTTG       | 7,924                | Y-specific             |
| sd_s_4f        | CCGACTGAGTCCGTGTTGGA       | sd-s-9r        | GCTCATCTGCCTGGCAATATTTGT   | 17,703               | Y-specific             |
| dup-st-3f      | CTGGCTACTTTAGCTGTCAAGTGTCC | dup-st-3r      | CGGTGTATTCTTCAGCGGTACTGT   | 9,344                | Y-specific             |
| sd-s-10f       | AAATCAGCACAGCCGCACAC       | sd-s-10r       | TCTTCATCACGTCGGGGTCA       | 3,336                | Y-specific             |
| sd-s-11f       | ACTTCGGACCTGGCCATCTG       | sd-s-11r       | GCTCCCTGGTCTCCCGTTCT       | 3,200                | Y-specific             |
| sd-s-12f       | TGCCAGCCTCCATCTTCTCC       | sd-s-16r       | TTCTCTGTGTTGGCCCTCTC       | 14,776               | Y-specific             |
| sd-s-15f       | CCCAGAGGTGGTTCCCGTAA       | sd-s-17r       | GCCTTCGCAAGGAGGTCAGA       | 9,051                | Y-specific             |
| commonR        | ACATGCAGCTCTTCTCCTTAC      | sd-9r          | TGGACAGCCTTTTCCAGAGAGA     | 17,824               | Y-specific             |
| sd-4f          | CCTCCAACCTGATTATCGTCACC    | sd-9r          | TGGACAGCCTTTTCCAGAGAGA     | 11,215               | Y-specific             |
| sd-9f          | CCGTATGCGGAAGATCCAGA       | sd-16r         | AGCCGAGGTAAGGAGGGACA       | 14,848               | Y-specific             |
| sd-17f         | GTTTGGCTGGTCGGCATAAA       | sd-20r         | TTTGCGCCACTATTTCAGCAC      | 7,668                | Y-specific             |
| sd-20f         | GGTTCCAATCCAGACTCAGCA      | sd-23r         | GCACTTTTGCGCATTTGGTT       | 9,434                | Y-specific             |
| sd-23f         | GGGGAGCCGACACTTTCAG        | sd-24r         | CCCCATTTGTCACGTTCCAG       | 2,176                | pseudoautosomal region |
| sd-25f         | GGGCTCACAGGACCCCCTAT       | break-1r       | GAGGAAGCTTCACCAGATGCTAATGT | 2,127                | Pseudoautosomal region |
| 105f           | CCATCCACCACAGCTCCATC       | out-sd-1r      | GAGGCCGGTATTCCCCTGAA       | 10,425               | Pseudoautosomal region |
| 105f           | CCATCCACCACAGCTCCATC       | appl1-22r      | GACAGTCCGCAGGTAACCTTCTTT   | 13,969               | Pseudoautosomal region |
| Appl-280f      | GAGTTCTTGTCACGCCGTCCTTCC   | Appl1-2100r    | GCCTCAGACTCGCCCTTCTTCTCC   | 8,308                | Pseudoautosomal region |
| Standard PCR   |                            |                |                            |                      |                        |
| sd-s-1f        | GGAGGGGGAAAGGAGTGAGG       | sd-s-1r        | TTGGGCTTCTTGACGAGGA        | 3,259                | Y-specific             |
| sd-s-2f        | CGACAGCGGGCAGCAATAAT       | sd-s-2r        | GCTTCGTGACGGAGGCTGAT       | 3,245                | Y-specific             |
| sd-s-3f        | CTGGGCTACCGGAGGAGGTT       | sd-s-3r        | GGCCCGCCAAACTTGAAAAA       | 3,212                | Y-specific             |
| sd-s-4f        | CCGACTGAGTCCGTGTTGGA       | sd-s-4r        | TCTGGAGAAAAGTGGGTCGAA GA   | 3,208                | Y-specific             |

|          |                                 |          |                              |       |            |
|----------|---------------------------------|----------|------------------------------|-------|------------|
| sd-s-5f  | TCCTCTTGGGCATTGGGAAA            | sd-s-5r  | TCGACTGTGTTGGGCCTTTG         | 3,238 | Y-specific |
| sd-s-6f  | TGTGCTTTCCTGGACCACTCC           | sd-s-6r  | GGAGCGGGAAGAGAGGGTTC         | 3,263 | Y-specific |
| sd-s-7f  | GCCAGTCCCACGGGTGTAAT            | sd-s-7r  | CCACAGATGCCTCGGATGGA         | 3,224 | Y-specific |
| sd-s-8f  | GCCCACTGCACTCAGCAAAA            | sd-s-8r  | CCAGCTTGAAGCCATGATGC         | 3,209 | Y-specific |
| sd-s-9f  | AGGCAGCTCCAGAGCCTTCA            | sd-s-9r  | GCTCATCTGCCTGGCAATATTT<br>GT | 3,244 | Y-specific |
| sd-s-10f | AAATCAGCACAGCCGCACAC            | sd-s-10r | TCTTCATCACGTCGGGGTCA         | 3,337 | Y-specific |
| sd-s-11f | ACTTCGGACCTGGCCATCTG            | sd-s-11r | GCTCCCTGGTCTCCCGTTCT         | 3,201 | Y-specific |
| sd-s-12f | TGCCAGCCTCCATCTTCTCC            | sd-s-12r | GCGCCTGGCTGTCTTTCAGT         | 3,277 | Y-specific |
| sd-s-13f | AAGGATGCTCCTGGGCCTTC            | sd-s-13r | GCAAGGGTAACGTGGGGACA         | 3,223 | Y-specific |
| sd-s-14f | GGGGTGTGTCGGGACATTTA            | sd-s-14r | TGCTCCTGGTCCCAGAAAAGG        | 3,278 | Y-specific |
| sd-s-15f | CCCAGAGGTGGTTCCCGTAA            | sd-s-15r | GACCCGCAACATCATCAACG         | 3,225 | Y-specific |
| sd-s-16f | GCGAGCTTGTCCGGACCTAT            | sd-s-16r | TTCTCCTGTTGGCCCTCCTC         | 3,205 | Y-specific |
| sd-s-17f | GTCGCCAGCGTCTGTCTTA             | sd-s-17r | GCCTTCGCAAGGAGGTCAGA         | 3,206 | Y-specific |
| sd-1f    | GGCAATCAGGTGAGGTCACAG           | sd-1r    | CAAATCAGACGGGAGGCAAA         | 2,229 | Y-specific |
| sd-2f    | CAGTACCGGTATGTGTTTTTATTAC<br>CG | sd-2r    | TCACCTGTGGCCGCTTTTTA         | 2,201 | Y-specific |
| sd-3f    | TGGAAGCGCTACAACCCAGA            | sd-3r    | AGCCAGTCTGCAGGGAGTCA         | 2,224 | Y-specific |
| sd-4f    | CCTCCAACCTGATTATCGTCACC         | sd-4r    | GCGGAAGATGGTTTCCAGGT         | 2,208 | Y-specific |
| sd-5f    | CGTCCACAAGTCGGATCTCA            | sd-5r    | TCCAGAAGAATCAGGCAACCA        | 2,206 | Y-specific |
| sd-6f    | TAGTTGGGGTCCGCTCAGA             | sd-6r    | CATTTTTGTGCCCGTAAGATCC       | 2,224 | Y-specific |
| sd-7f    | AGCTGGGTGGGCTGAGCTT             | sd-7r    | CTGGTCAAGGGCGACAGAAA         | 2,205 | Y-specific |
| sd-8f    | TGCAAGGAGAACGGAGAGATG           | sd-8r    | TGGTCAAATTTTGTGCCCTGA        | 2,216 | Y-specific |
| sd-9f    | CCGTATGCGGAAGATCCAGA            | sd-9r    | TGGACAGCCTTTTCCAGAGAGA       | 2,237 | Y-specific |
| sd-10f   | CAGTACAGCAGCCACGCAAA            | sd-10r   | GGCGCATGCTGAAACATACA         | 2,221 | Y-specific |
| sd-11f   | GTCGTCGTTACCGTGGTTC             | sd-11r   | TTTTCCGACACAATATGAGGGT<br>TT | 2,200 | Y-specific |
| sd-12f   | CGCAGTTTGGCATGAAATCC            | sd-12r   | CACGAAGCAACACTTTCAGCA        | 2,201 | Y-specific |
| sd-13f   | TGTCTCCTCCTGGCTCCAAA            | sd-13r   | TGAGACAAGCAGAGCTGAACA<br>GG  | 2,204 | Y-specific |
| sd-14f   | GGCAGCTGTCCACTTAAACACC          | sd-14r   | TCCACCCAGAGTTCAGGTGAG        | 2,226 | Y-specific |
| sd-15f   | GGATGAACCACAGGCAGCTC            | sd-15r   | CTGCGGCGTTTGTCTCTC           | 2,205 | Y-specific |
| sd-16f   | TGGATGACACCTGGGTCAAAA           | sd-16r   | AGCCGAGGTAAGGAGGGACA         | 2,252 | Y-specific |

|        |                       |        |                        |       |                        |
|--------|-----------------------|--------|------------------------|-------|------------------------|
| sd-17f | GTTTGGCTGGTCGGCATAAA  | sd-17r | AAGGGGTTGGAGGATGATGC   | 2,204 | Y-specific             |
| sd-18f | TCTCCACACAGCGACCTCCT  | sd-18r | GGTCTTCATTCCCCAAATGTGA | 2,232 | Y-specific             |
| sd-19f | ACAAAATGGGGAGGGGAACC  | sd-19r | TGGCCATTTTTGTTTGACGAA  | 2,205 | Y-specific             |
| sd-20f | GGTTCCAATCCAGACTCAGCA | sd-20r | TTTGCGCCACTATTCAGCAC   | 2,278 | Y-specific             |
| sd-21f | GCAAAAAGCTTGCCAAACTCC | sd-21r | TTGTGTGTCCGCCATTTTCA   | 2,200 | Y-specific             |
| sd-22f | CGTGCACATTTTGCATTTCC  | sd-22r | CGAGTCTGCCCTTCCGTTTT   | 2,223 | Y-specific             |
| sd-23f | CTGGAATGGATCGTCGGAAA  | sd-23r | TGCCACCAGATTTTGCATGGT  | 2,009 | Pseudoautosomal region |
| sd-24f | GGGGAGCCGACACTTTCAG   | sd-24r | GCACTTTTGCGCATTTGGTT   | 2,220 | Pseudoautosomal region |
| sd-25f | CCCCATTTGTCACGTTCCAG  | sd-25r | CTGGTGCAGCCACTGAAG     | 2,206 | Pseudoautosomal region |
| sd-26f | GGGCTCACAGGACCCCCTAT  | sd-26r | TCACGGCTGCCCTGTAC      | 2,219 | Pseudoautosomal region |

Table S15B. Primers for the PCR to confirm absence of female sequence in the male-specific region in *T. niphobles*, *T. syderi* and *T. vermicularis*

| Forward primer        | Sequence                 | Reverse primer        | Sequence             | Amplicon length (bp)               | location   |
|-----------------------|--------------------------|-----------------------|----------------------|------------------------------------|------------|
|                       |                          |                       |                      | 352 for TN, 380 for TS, 382 for TV | Y-specific |
| TS_chr14_8812k_0.4k_F | AAAATGGAGTTAACAGCAGAGGTT | TS_chr14_8812k_0.5k_R | CGTCTCCTGAAGGATTTCCA | 408 for TN, 408 for TS, 407 for TV | Chr14      |



Table S16. Summary of Nanopore long read (PromethION) (22.73× coverage) for a male *T. snyderi*

|                                    |               |
|------------------------------------|---------------|
| Number of cell                     | 1             |
| Number of Subread                  | 890,724       |
| Total Bases of Subread (bp)        | 9,093,477,165 |
| Mean read length of Subread (bp)   | 19,723        |
| Median read length of Subread (bp) | 16,866        |
| Subread N50 (bp)                   | 25,290        |

Table S17. Summary of stLFR paired-end short-read (80.43× coverage) for a male *T. snyderi*

| Read length | Paired-end | Reads       | Base (Gb) | Platform                       | Coverage |
|-------------|------------|-------------|-----------|--------------------------------|----------|
| 245x2       | 100x2      | 160,874,075 | 32        | DNBSEQ-G400<br>(MGISEQ-2000RS) | 80.43    |

Table S18. Summary of PacBio long read (Sequel II) (322.09× coverage) for a male *T. vermicularis*

|                                    |                 |
|------------------------------------|-----------------|
| Number of SMRT cell                | 1               |
| Number of Subread                  | 11,257,208      |
| Total Bases of Subread (bp)        | 128,836,539,683 |
| Mean read length of Subread (bp)   | 11,444          |
| Median read length of Subread (bp) | 9,777           |
| Subread N50 (bp)                   | 14,928          |

Table S19. Primer sequences for microsatellite markers and their genomic position used for fine mapping in Family A, B, and C of *T. Snyderi*

| Marker    | Forward primer         | Reverse primer           | Position in FUGUv5 |           |
|-----------|------------------------|--------------------------|--------------------|-----------|
|           |                        |                          | chromosome         | bp        |
| f1335     | GAGCAACAAGCTGCATCAAA   | AGCCTGCTGGGAAATACTTG     | 18                 | 161,825   |
| f1142     | CTTCTCAGAACGGGTGTGGT   | ATCAGCTGCCATGTGATGTC     | 18                 | 199,012   |
| f1220     | GGTTGGCAGCCAGACATAAT   | GGATGAAATCTCCCTTTTGC     | 18_un              | 842,772   |
| f1334     | GCAGCTCTGTGTGTGATCGT   | AGGAGGATAAAAAGGGCATGG    | 18                 | 864,742   |
| f1063     | TGACCTCCAGCCTGACAAAT   | TCAGAGCTGTGGAACCTTGA     | 18                 | 1,451,492 |
| f1438     | GTTCTGCGCCTGTATTGTT    | GATCTATCCAAAGGCCGTC      | 18_un              | 1,505,004 |
| f77       | TTGGCTAAGATGGTTTTAC    | AGATGCTGCTGCTGGTTTTACTGG | 18                 | 2,384,479 |
| f1601     | AATATCTGCTCCCTCCTCTGC  | AGCAGCTGTTTCAGGCAACT     | 18_un              | 1,742,409 |
| f204      | GGTACGCTGTTCACGAG      | CACCACTACCATCAACCCCATCTT | 18                 | 4,836,362 |
| f116      | AGCGGGGTGAGAACAAATTA   | ATGAGGGAGAGGAGACCACA     | 18                 | 6,323,528 |
| f687      | TTCCTGCTTCTGGTTTTGCT   | CGCCAATTACGCGATTATCT     | 18_un              | 115,569   |
| f348      | TTGAATGCAACCACCTTCA    | AGGTGCAGGAAACTGACAGC     | 18                 | 6,885,207 |
| f1027     | GCTTTAATTGCGCGTGTGTA   | TGCTTTGTGCCGCAATATAC     | 18                 | 7,373,495 |
| f1448     | TGAGAATGTCCACTGTGTCCTC | GACCTCCTGGACCAGTTCAA     | 18_un              | 1,525,229 |
| f1381     | GGGGAGGGCCGTAAATTAG    | CTGCCTGAATCTCGGTGACT     | 18_un              | 1,155,540 |
| f1356     | CCATGGGAAAGTGGAACC     | GAAAGGAGCTGCCAGACTGA     | 18_un              | 1,104,420 |
| sca273-1  | GCCATATGAGTTAGCCCCCTA  | TCCTGTCCAGCTTAACCACA     | 18_un              | 490,760   |
| sca273-5  | GAGGGATGAAAGCAGACAGG   | CACAGGAACTGACGGTTCAA     | 18_un              | 537,289   |
| f38       | AAGGGACTCTGGTTCACAGC   | AACTTGGGATGTTGGGAAAA     | 18                 | 7,519,234 |
| f90       | CCTACGACGAGGTGAAGGAG   | CAGGTCCTGGTAGGACTGGA     | 18                 | 7,852,540 |
| sca168-2  | ATGGGCGCCAAACATAATAG   | ATGGTGCGTTCAAGAGCAG      | 18                 | 7,976,009 |
| f1432     | AACCAAAGAAGGACGCGTTA   | GTCTGGGAAGGTTCTGTGA      | 18_un              | 1,419,398 |
| sca708-1  | AGCAGGTTGGGTGTGAAAAG   | CGTTGAGTTGAATCGCTGAG     | 18_un              | 1,697,768 |
| f1611     | TTCCTGCCTCCAACATTTTC   | TGCTGAGGATCATCACAAGA     | 18_un              | 1,790,732 |
| f1618     | CCGGGGTTCCTGTAGCTAAT   | CAGCTACGGGCTTTGTTCTC     | 18_un              | 1,817,835 |
| f982      | CCAACAGCCAAATCCACTTT   | GCTGCTCTGTCTGACAATGG     | 18_un              | 1,000,724 |
| sca556-2  | GCGAAAAGTGTGTCACAAATG  | TGGTCCTGGTCTTCACACTG     | 18_un              | 1,306,897 |
| f1385     | AGCCGTTCCAGCTGTTACTC   | CTGTGACGCAGGATTCCTCT     | 18_un              | 1,246,518 |
| f1659     | CATGCTGGGCTACTGTGGTA   | CACAGACGATGAGCAGGAGA     | 18_un              | 1,335,649 |
| sca1119-1 | GGCATCACTGTTTTGACTGC   | GGAAGCTGTTCCAGGTGTGT     | 18_un              | 1,336,102 |
| f1433     | AAGGAGGTCGTCCTCTGACA   | TCACCTGTCACAACAGGTACG    | 18_un              | 1,325,055 |
| f1393     | TTCCTGGGTGGAACAATGA    | TCGGAGTCTTTTGATCAGG      | 19_un              | 1,637,578 |

Table S20. Primer sequences for microsatellite markers and their genomic position used for fine mapping in Family E of *T. vermicularis*

| Marker    | Forward primer         | Reverse primer         | Position in FUGUv5 |           |
|-----------|------------------------|------------------------|--------------------|-----------|
|           |                        |                        | chromosome         | bp        |
| f471      | GGGTGCATTTTCAGTGCTTCT  | TCTCTTGCCTCCTTTCTCTCTC | 10                 | 2,726,410 |
| f1094     | TGAGAAATGCCTTGACAGCA   | TAATGTGGGGGAGAGAGCTG   | 10                 | 279,958   |
| f1648     | ACTCATCCACGCTTCCTGAT   | AATCGAACCCAGGACCTTCT   | 10_un              | 2,750,871 |
| f410      | GATGAAATCCCTCACGGAGA   | TGCGCAACATACGATGTCA    | 10                 | 1,336,695 |
| f1218     | AATCCAAATCCCGATTTTCC   | CCAGTATGTTTTGGCGGAGT   | 10_un              | 1,218,659 |
| f726      | TTCCTACTTCCACGCCTGTC   | CCACTATGCGACTGAGGTGA   | 10_un              | 948,203   |
| f861      | AGTGGTGGAGGGTCTGTCTG   | GCTTCATTAGATTGCGTGCAT  | 10_un              | 1,492,219 |
| f1258     | GCCAAGACAAACGTTCCAGT   | TTCAATGGGGACACTCACAA   | 10                 | 3,996,882 |
| f202      | CCCAGCAGTGCTCTGAAATA   | GACGCAGGGAATCTCACAA    | 10                 | 4,777,201 |
| f470      | TGGCCTCAACTCTGTTTCAA   | GTTACCACCGAAACCCTCTG   | 10                 | 6,081,561 |
| f1298     | CAGGAAGCCAAAGTGCTGTT   | GTGCAGGAGGAACCATTGAC   | 10                 | 5,754,685 |
| f657      | GCTGTGTTTGCTCTCCATCA   | GCCTGTGTGGGTTTCACCTA   | 10                 | 6,673,873 |
| f1329     | ACGACATCTGGCTGGTTGAT   | CATCATCCCACATCCTACCC   | 10                 | 6,874,354 |
| f1082     | GTTAGGTGGCCTTGAAACA    | CCTCCATCAACCACATCTCC   | 10                 | 7,148,077 |
| f1702-2*  | AGCATCCAACAGGCAGAAAT   | AGCCATCTTGAATCCTGTGC   | 10_un              | 2,875,022 |
| f1006     | ACACGCACTCACTCACTTGC   | AGCTTTCAGAATGCAGCACA   | 10                 | 8,623,283 |
| f1307     | AGTTCGAGCTCCGCAAAGTC   | TAGCCACGCTCTAACCAGTG   | 10                 | 8,694,162 |
| f1422     | GCTAAAACGGACAGGCAGAG   | TTGAGCTCATCCTCCCCTC    | 10                 | 8,754,095 |
| f1684-2*  | GACAGAGAGGGCGATTTGAC   | CCACCAGTGCAGAAACATTG   | 10_un              | 2,868,401 |
| f1684-4*  | GCGCTCAGATCAGAACACAG   | TGGATCGTTGATGAAGCAGA   | 10_un              | 2,852,214 |
| sca317-1* | ATTTGCGGAGGACAGATTCA   | AGCTGCCTCATTGGTTGTTT   | 10_un              | 1,751,153 |
| sca317-2* | TGGATGAGGTTTCCCTTGACC  | ATGTTTCCATGACCCAGAGC   | 10_un              | 1,753,339 |
| f724      | CCACCTGGAGAAAAGTGCTC   | AAATTGATGCCATCGGACTC   | 10_un              | 1,568,157 |
| f34-3*    | TTTCCCCACTAGGAGAGCTG   | GCCTGGCAGAGAGAGAGATG   | 10_un              | 2,816,704 |
| f34-4*    | AATAATGAGGCGGAGGGATT   | CCCCAACATGTTCTGATGT    | 10_un              | 2,787,913 |
| sca297-8* | ACAGATGGAACCAGGGTCAG   | GATTTGCCGAAGGTCAAAAA   | 10                 | 8,813,985 |
| sca297-6* | TGGAAGCTGCGACAATAAAG   | GGAACGGTCCAAGAACCATA   | 10                 | 8,852,028 |
| sca297-5* | CCCAAGATCCTGAACAGGTG   | GAACCTCCGATACGTCCAGA   | 10                 | 8,854,961 |
| sca297-3* | TTCAGATTGACGACACCTGTTT | CGGTATGGAAACGGAATGTT   | 10                 | 9,088,101 |
| f1603     | GACCCACAGGTACAGCATT    | ACCTTCGCCACAACAACTC    | 10_un              | 2,673,931 |
| sca541-1* | AGATCAACGGGGCTGAAGT    | GGATGCAGTGTGTCCCTGTTT  | 10_un              | 2,334,935 |
| sca541-3* | CACAAAAGCAGGTGCGAGTA   | AAATGCTTTTGTCTGAGGTG   | 10_un              | 2,400,464 |
| f1374     | AGGAGAGCTGTGAGGCTACG   | CGGGGAAACCAGAGGATTAC   | 10_un              | 2,335,369 |

\* Markers newly developed in this study
